1 The SARS-CoV-2 multibasic cleavage site facilitates early serine protease-  
2 mediated entry into organoid-derived human airway cells  
3

4 Anna Z. Mykytyn<sup>1†</sup>, Tim I. Breugem<sup>1†</sup>, Samra Riesebosch<sup>1</sup>, Debby Schipper<sup>1</sup>, Petra B. van den Doel<sup>1</sup>,  
5 Robbert J. Rottier<sup>2</sup>, Mart M. Lamers<sup>1‡</sup>, Bart L. Haagmans<sup>1‡\*</sup>

6 <sup>1</sup> Viroscience Department, Erasmus University Medical Center, Rotterdam, the Netherlands

7 <sup>2</sup> Department of Pediatric Surgery, Erasmus University Medical Center - Sophia Children's Hospital,  
8 Rotterdam, the Netherlands.  
9

10 \* Corresponding author: Bart L. Haagmans

11 **Email:** [b.haagmans@erasmusmc.nl](mailto:b.haagmans@erasmusmc.nl)

12 **Keywords**

13 COVID-19, SARS-CoV-2, SARS-CoV, multibasic cleavage site, serine proteases, airway organoids, furin  
14 site

15 **Author Contributions**

16 †These authors contributed equally to this work.

17 ‡These authors contributed equally to this work.

18

19

20

21

22

23

24

25

26

27

28

29

30

31

32

33

34

35

36

37

38

39

40

41 **Abstract**

42 After the SARS-CoV outbreak in 2003, a second zoonotic coronavirus named SARS-CoV-2, emerged late  
43 2019 in China and rapidly caused the COVID-19 pandemic leading to a public health crisis of an  
44 unprecedented scale. Despite the fact that SARS-CoV-2 uses the same receptor as SARS-CoV,  
45 transmission and pathogenesis of both viruses seem to be quite distinct. A remarkable feature of the  
46 SARS-CoV-2 spike is the presence of a multibasic cleavage site, which is absent in the SARS-CoV spike.  
47 The viral spike protein not only attaches to the entry receptor, but also mediates fusion after cleavage by  
48 host proteases. Here, we report that the SARS-CoV-2 spike multibasic cleavage site increases infectivity  
49 on differentiated organoid-derived human airway cells. Compared with SARS-CoV, SARS-CoV-2 entered  
50 faster into the lung cell line Calu-3, and more frequently formed syncytial cells in differentiated organoid-  
51 derived human airway cells. Moreover, the multibasic cleavage site increased entry speed and plasma  
52 membrane serine protease usage relative to endosomal entry using cathepsins. Blocking serine protease  
53 activity using the clinically approved drug camostat mesylate effectively inhibited SARS-CoV-2 entry and  
54 replication in differentiated organoid-derived human airway cells. Our findings provide novel information  
55 on how SARS-CoV-2 enters relevant airway cells and highlight serine proteases as an attractive antiviral  
56 target.

57

58 **Significance Statement**

59 Highly pathogenic coronaviruses have spilled from animals to humans three times in the past two  
60 decades. Late 2019, SARS-CoV-2 emerged in China and was declared a pandemic by March 2020. The  
61 other two highly pathogenic coronaviruses, SARS-CoV and MERS-CoV, emerged in 2002 and 2012,  
62 respectively, but did not attain sustained human-to-human transmission. Given the high diversity of  
63 coronaviruses in animals, urbanization and increased air travel, future coronavirus pandemics are likely to  
64 occur intermittently. Identifying which factors determine pandemic potential and pathogenicity are  
65 therefore of key importance to global health. Additionally, there is an urgent need to rapidly translate

66 fundamental knowledge to the clinic, a process that is expedited through the use of relevant cell culture  
67 systems.

68

## 69 **Main Text**

70

## 71 **Introduction**

72

73 The ongoing coronavirus disease (COVID-19) pandemic is caused by the severe acute respiratory  
74 syndrome coronavirus 2 (SARS-CoV-2), which emerged in central China late 2019 (1). Within months this  
75 virus spread globally and as of August 26, 2020, over 24 million cases have been reported, including over  
76 800,000 deaths. Halting SARS-CoV-2 spread has shown to be highly complex, putting great strain on  
77 health systems globally. SARS-CoV-2 is the third zoonotic coronavirus to emerge from animal reservoirs  
78 within the past two decades, after SARS-CoV and Middle East respiratory syndrome coronavirus (MERS-  
79 CoV), in 2002 and 2012, respectively (2-5). In contrast to SARS-CoV-2, SARS-CoV and MERS-CoV have  
80 not attained sustained human-to-human transmission. These coronaviruses belong to the  
81 *Betacoronavirus* genus (family *Coronaviridae*, subfamily *Orthocoronavirinae*), which is thought to  
82 ultimately originate from bats, but can spread to humans via intermediate hosts (6-8).

83

84 Currently it is largely unknown what factors determine coronavirus transmission to and between humans,  
85 but one important determinant may be the coronavirus spike (S) protein, which is the main glycoprotein  
86 incorporated into the viral envelope. Enveloped viruses, including coronaviruses, deposit their genomes  
87 into host cells by coalescing their membranes with the cell. This function is executed by S protein trimers,  
88 which fuse viral and cellular membranes after binding to the entry receptor (9). In addition, coronaviruses  
89 can spread from cell to cell when coronavirus S proteins traffic to the plasma membrane of infected cells  
90 and fuse with neighboring cells, generating multinucleated giant cells (syncytia). Coronavirus S proteins  
91 are synthesized in infected cells in a stable and fusion-incompetent form and are activated through  
92 cleavage by host proteases. Proteolysis controls the timely release of the S protein's stored energy

93 required to fuse membranes, which allows virions to be stable in the environment yet fusogenic after  
94 contacting entry receptors on host cell membranes.

95

96 Cleavage is essential for coronavirus infectivity and can occur in the secretory pathway of infected cells or  
97 during viral entry into target cells (9, 10). Several groups of host proteases, including type II  
98 transmembrane serine proteases (hereafter referred to as serine proteases), proprotein convertases and  
99 cathepsins, can cleave the S protein. Specific sites in the S protein regulate protease usage and therefore  
100 play an important role in determining cell tropism. Similarly, tropism can be determined by the availability  
101 of proteases that can activate the S protein (10-14). The S protein consists of two domains, the receptor  
102 binding (S1) domain and the fusion (S2) domain. These domains are separated by the S1/S2 cleavage  
103 site, which in some coronaviruses such as SARS-CoV-2, forms an exposed loop that harbors multiple  
104 arginine residues and is therefore referred to as a multibasic cleavage site (15, 16). Cleavage of this site  
105 can occur in secretory systems of infected cells by proprotein convertases, including furin. S1/S2  
106 cleavage does not directly trigger fusion but may facilitate or regulate further cleavage (17). A second  
107 proteolysis step takes place at a more C-terminal site within the S2 domain, notably the S2' site. S2'  
108 cleavage is thought to occur after the virus has been released from producing cells and is bound to host  
109 cell receptors on receiving cells. The S2' site is processed by serine proteases on the plasma membrane  
110 or by cathepsins in the endosome. Whereas S2' cleavage appears to be crucial for coronavirus infectivity,  
111 not all coronaviruses contain a multibasic S1/S2 site and little is known of its function (9). Until recently, all  
112 viruses within the clade of SARS-related viruses, including SARS-CoV, were found to lack a multibasic  
113 S1/S2 cleavage site. However, SARS-CoV-2 contains a PRRA insertion into the S protein, precisely N-  
114 terminally from a conserved arginine, creating a multibasic RRAR cleavage motif. Exchanging the SARS-  
115 CoV-2 S multibasic cleavage site for the SARS-CoV monobasic site was recently shown to decrease  
116 fusogenicity on a monkey kidney cell line (VeroE6) and infectivity in a human lung adenocarcinoma cell  
117 line (Calu-3) (18, 19). However, cancer cells often poorly represent untransformed cells and thus the  
118 question remains whether the multibasic cleavage site would affect infectivity on relevant lung cells.  
119 Another study showed that entry of SARS-CoV-2 pseudoparticles into both Calu-3 cells and primary

120 airway cultures could be blocked using a clinically approved serine protease inhibitor (camostat  
121 mesylate), but no effects on authentic virus entry and replication were shown (20). Here we investigated if  
122 the SARS-CoV-2 multibasic cleavage site affects entry into relevant human lung cells (i), if the multibasic  
123 cleavage site can alter protease usage during entry (ii), and if authentic SARS-CoV-2 entry and  
124 replication can be inhibited using camostat mesylate (iii).

125

## 126 **Results**

127

128 **Entry into lung adenocarcinoma and differentiated organoid-derived human airway cells is**  
129 **facilitated by the SARS-CoV-2 S multibasic cleavage site.** Recently, Hoffmann and colleagues (2020)  
130 showed that the SARS-CoV-2 multibasic cleavage motif increases entry into Calu-3 cells by exchanged  
131 this motif and several N-terminally flanking amino acids with the monobasic S1/S2 site found in SARS-  
132 CoV or in a related bat virus RaTG13 (18). Building on these observations, we generated several SARS-  
133 CoV-2 S protein mutants and used these to generate vesicular stomatitis virus- (VSV) based  
134 pseudoparticle stocks (PPs) expressing a green fluorescent protein (GFP). Instead of exchanging  
135 cleavage sites, we mutated the minimal RXXR multibasic cleavage motif by deleting the PRRA insertion  
136 (Del-PRRA), changing the last arginine to an alanine (R685A), or to a histidine (R685H) in order to  
137 preserve the positive charge at this site (Fig. 1A). Immunoblotting revealed that wild type and mutant PPs  
138 were produced at similar levels (Fig. 1B). S1/S2 cleavage was observed for the wild type SARS-CoV-2  
139 PPs and abrogated by the PRRA deletion and the R685A and R685H substitutions, which is in agreement  
140 with studies showing that the SARS-CoV-2 S is cleaved by proprotein convertases, possibly furin (18,  
141 19). Next, we assessed the infectivity of these viruses and found that the SARS-2-Del-PRRA and SARS-  
142 2-R685A mutants were 5-10 fold more infectious on VeroE6 cells (Fig. 1C). In contrast, on the lung  
143 adenocarcinoma cell line Calu-3 the SARS-2-Del-PRRA, SARS-2-R685A, and SARS-2-R685H PPs were  
144 approximately 5-10 fold less infectious compared with the wild type PPs (Fig. 1D). These data show that  
145 the PRRA deletion and single point mutations could functionally destroy the multibasic cleavage site and  
146 suggest that this site enhances lung cell entry. Next, we assessed the effect of the multibasic cleavage

147 site in a relevant cell culture system, using airway organoids (21) that were dissociated, seeded onto  
148 collagen coated Transwell inserts and differentiated for 10-11 weeks at air-liquid interface in Pneumacult  
149 ALI medium (Stemcell). After differentiation, cultures contained ciliated cells, club cells and goblet cells  
150 (Fig. S1A-C). Moreover, they expressed the SARS-CoV-2 entry receptor angiotensin converting enzyme  
151 2 (ACE2) and transmembrane protease serine 2 (TMPRSS2), a serine protease previously shown to  
152 mediate SARS-CoV-2 entry when overexpressed (Fig. S1D-E) (20). For infection experiments, the  
153 differentiated pseudostratified epithelial layer was dissociated into small clumps, infected in suspension  
154 and then re-plated into basement membrane extract (BME), in which it formed spheroids. SARS-CoV-2  
155 PPs successfully infected airway spheroids, as observed by fluorescent microscopy (Fig. 1E). SARS-  
156 CoV-2 PPs were approximately 2 times more infectious on these cells compared with the SARS-2-Del-  
157 PRRA and SARS-2-R685A mutants, and 8 times more infectious than the SARS-2-R685H mutant (Fig.  
158 1F), demonstrating that the SARS-CoV-2 multibasic cleavage site facilitates entry into relevant human  
159 airway cells.

160

161 **SARS-CoV-2 enters Calu-3 cells faster than SARS-CoV and entry speed is increased by the**  
162 **multibasic cleavage site.** As SARS-CoV lacks the multibasic cleavage site, we compared its infectivity  
163 to SARS-CoV-2 and found that both PPs readily infected Calu-3 cells, indicating that the SARS-CoV S  
164 has adaptations other than the multibasic cleavage site to facilitate airway cell infection (Fig. 2A).  
165 Likewise, inserting the PRRA motif into SARS-CoV S and thereby generating a multibasic cleavage site  
166 did not increase PP infectivity on Calu-3 cells (Fig. S2). To investigate this further, we compared the entry  
167 route taken by these viruses in Calu-3 cells. For this purpose, we used inhibitors of two major coronavirus  
168 entry pathways (9). Serine proteases are known to mediate early coronavirus entry on the plasma  
169 membrane or in the early endosome, whereas cathepsins facilitate entry in late, acidified endosomes.  
170 Concentration ranges of either a serine protease inhibitor (camostat mesylate; hereafter referred to as  
171 camostat) or a cathepsin inhibitor (E64D) were used to assess the entry route into Calu-3 cells. Entry of  
172 SARS-CoV-2 PPs was not inhibited by E64D, but could be inhibited by camostat, indicating that SARS-  
173 CoV-2 exclusively uses serine proteases for entry into these cells (Fig. 2B-C). For SARS-CoV PPs, entry

174 was inhibited slightly by E64D (~10%), but camostat had a far stronger effect (~90%), indicating that  
175 SARS-CoV mainly uses serine proteases to enter Calu-3 cells but that a small fraction of virions enter via  
176 cathepsins (Fig. 2B-C). Previously, Calu-3 cells have been suggested to have low levels of cathepsin  
177 activity (16). The observation that some SARS-CoV PPs use cathepsins suggests that this virus less  
178 efficiently uses the surface serine proteases encountered early during entry, resulting in particles  
179 accumulating in the endosome, where they are cleaved by cathepsins. To test this, we measured the  
180 serine protease-mediated entry rate of SARS-CoV-2 and SARS-CoV by blocking entry on Calu-3 cells at  
181 different time points post infection using camostat. Cells were pretreated with E64D to prevent any  
182 cathepsin-mediated entry. Using both PPs and authentic virus (Fig. 2D-E) we observed that SARS-CoV-2  
183 entered faster than SARS-CoV via serine proteases. Next, we assessed whether the presence of a  
184 multibasic cleavage site could increase the serine protease-mediated entry rate into Calu-3 cells. For this  
185 purpose, we used SARS-CoV S PPs containing the PRRA insertion (SARS-PRRA) (Fig. 2F).  
186 Immunoblotting revealed that, in contrast to SARS-CoV PPs, SARS-PRRA PPs were partially cleaved  
187 (Fig. 2G). Whereas wild type SARS-CoV PPs used cathepsins, SARS-PRRA PPs did not (Fig. 2H-I). The  
188 serine protease-mediated entry rate of SARS-PRRA PPs on Calu-3 cells was higher compared with  
189 SARS-CoV PPs (Fig. 2J), and it was lower for SARS-2-Del-PRRA PPs compared with SARS-CoV-2 PPs  
190 (Fig. 2K). These findings show that the SARS-CoV-2 multibasic cleavage site facilitates serine protease-  
191 mediated entry on Calu-3 cells.

192

193 **Cell-cell fusion is facilitated by the SARS-CoV-2 multibasic cleavage site and SARS-CoV-2 is more**  
194 **fusogenic than SARS-CoV on differentiated organoid-derived human airway cells.** Next, we used a  
195 GFP-complementation cell-cell fusion assay (Fig. S3) to determine whether entry rate was associated  
196 with fusogenicity. In this assay, S and GFP-11 co-transfected HEK-293T cells fuse with GFP1-10  
197 expressing Calu-3 cells, resulting in GFP complementation and fluorescence. In HEK-293T cells,  
198 multibasic cleavage site containing S proteins were more cleaved than S proteins without this site (Fig.  
199 3A). We observed that SARS-CoV-2 S was more fusogenic than SARS-CoV S on Calu-3 cells (Fig. 3B-C)  
200 and in addition, the insertion of the multibasic cleavage site into SARS-CoV S increased fusion, whereas

201 mutations in the SARS-CoV-2 S multibasic cleavage site decreased fusion. To investigate differences in  
202 fusogenicity in a relevant cell system, we infected 2D differentiated organoid-derived human airway air-  
203 liquid interface cultures with SARS-CoV-2 and SARS-CoV and assessed the formation of syncytial cells  
204 at 72 hours post infection using confocal microscopy. Cells were termed syncytial cells when at least two  
205 nuclei were present within a single viral antigen positive cell that lacked demarcating tight junctions.  
206 SARS-CoV-2 frequently induced syncytia, whereas SARS-CoV-infected cells rarely contained multiple  
207 nuclei (Fig. 3D; and E for quantification).

208

209 **The SARS-CoV-2 multibasic cleavage site increases serine protease usage and decreases**  
210 **cathepsin usage.** The findings above indicate that SARS-CoV-2 S is more fusogenic and mediates  
211 faster entry through serine proteases compared with SARS-CoV, indicating that the multibasic cleavage  
212 site alters protease usage. To investigate this, cells that contain both serine and cathepsin protease-  
213 mediated entry should be used. Therefore, we focused on VeroE6 cells, which have an active cathepsin-  
214 mediated cell entry pathway, as on these cells both SARS-CoV-2 PP and SARS-CoV PP entry was  
215 blocked by E64D, and not by camostat (Fig. 4A-B). To generate a cell line in which both entry pathways  
216 are active, we stably expressed TMPRSS2 in VeroE6 cells. In these cells, SARS-CoV-2 PP entry was  
217 inhibited ~95% by camostat, whereas SARS-CoV PPs were only inhibited ~35% (Fig. 4C-D). In  
218 accordance, E64D did not block SARS-CoV-2 PP entry, while it decreased SARS-CoV PP entry ~30%.  
219 These findings indicate that despite a functional serine protease-mediated entry pathway, a significant  
220 part of SARS-CoV PPs still retained cathepsin-mediated entry whereas SARS-CoV-2 PPs only used  
221 serine proteases for entry. This phenotype was found to be linked to the multibasic cleavage site as  
222 SARS-CoV-2 PPs containing mutations in this site entered less through serine proteases and more  
223 through cathepsins (Fig. 4E-F). In accordance, the introduction of the multibasic cleavage site into SARS-  
224 CoV PPs increased serine proteases usage, while decreasing cathepsin usage (Fig. 4G-H).

225

226 **SARS-CoV-2 entry and replication is dependent on serine proteases in differentiated organoid-**  
227 **derived human airway cells.** Altogether, our findings show that SARS-CoV-2 preferentially uses serine



228 proteases for entry, when present, and that the multibasic cleavage site increases fusogenicity and  
229 infection of human airway cells. Hence, serine protease inhibition could be an attractive therapeutic  
230 option. Therefore, we assessed whether camostat could block SARS-CoV-2 entry and replication using  
231 differentiated organoid-derived human airway spheroids. In these differentiated spheroids the apical side  
232 of the cells was facing outwards (Fig. 5A-B), facilitating virus excretion into the culture medium. These  
233 cells were infected with SARS-CoV-2 at a high multiplicity of infection (MOI) of 2, but pretreatment with  
234 camostat efficiently blocked virus infection as evidenced by confocal microscopy on spheroids fixed at 16  
235 hours post infection (Fig. 5A). Cathepsin inhibition did not affect entry. At 24 hours post infection, SARS-  
236 CoV-2 infection spread in organoids treated with DMSO or E64D, but only rare single cells were observed  
237 after camostat treatment (Fig. 5B). Next, we tested whether virus replication was affected by camostat  
238 pretreatment of the airway spheroids. After infection at a MOI of 2, replication was assessed at 2, 24, and  
239 48 hours post infection by RT-qPCR and live virus titration. In the control spheroids, SARS-CoV-2  
240 replicated to high titers, while camostat reduced replication by approximately 90% (Fig. 5C-E). We also  
241 tested the effect of camostat in 2D differentiated airway cultures at air-liquid interface using a low MOI of  
242 0.1. Here, viral titers in apical washes did not increase after camostat pretreatment (Fig. 5F), whereas  
243 replication to moderate titers was observed in the control wells. These findings indicate that SARS-CoV-2  
244 utilizes serine proteases for efficient entry into relevant human airway cells and serine protease inhibition  
245 decreases replication.

246

## 247 **Discussion**

248

249 SARS-CoV-2 harbors a remarkable multibasic cleavage site in its S protein. Recent findings show that  
250 replacing this site with the SARS-CoV monobasic cleavage site decreases PP infectivity on the  
251 adenocarcinoma cell line Calu-3, suggesting that this motif is a human airway adaptation (18). This raised  
252 the question whether similar findings would be obtained in relevant lung cells. In this study, we found that  
253 the SARS-CoV-2 multibasic cleavage site alters tropism by increasing infectivity on differentiated

254 organoid-derived human airway spheroids. Furthermore, we report that the multibasic cleavage site  
255 increases S protein fusogenicity, entry rate and serine protease usage. Blocking serine protease activity  
256 in organoid-derived differentiated human airway spheroids using the clinically approved drug camostat  
257 mesylate effectively inhibited SARS-CoV-2 entry and replication, suggesting that serine protease-  
258 mediated entry is the main entry route *in vivo*.

259

260 In contrast to SARS-CoV-2, SARS-CoV does not contain a multibasic cleavage site, yet infects Calu-3  
261 cells with similar efficiency. Introducing a multibasic cleavage site to SARS-CoV S did not increase  
262 infectivity, indicating that the SARS-CoV S has other adaptations to enter airway cells. These data are in  
263 agreement with a study that observed no benefit of furin cleavage on SARS-CoV infectivity (22). Whereas  
264 SARS-CoV-2 appears to have adapted to increase fusogenicity and serine protease-mediated S  
265 activation for rapid plasma membrane entry, SARS-CoV may have specific adaptations to enter these  
266 cells more slowly. Slower viral dissemination may explain why most SARS-CoV patients entered the  
267 infectious phase of the disease after symptom onset (23, 24). This could have played a role in the 2003  
268 SARS-CoV epidemic, allowing strict public health interventions including quarantining of symptomatic  
269 people and contact tracing to halt viral spread. For SARS-CoV-2, however, several studies have reported  
270 that individuals can transmit the virus to others before they become symptomatic (25-29). Whether  
271 differences in entry rate allow SARS-CoV-2 to spread more efficiently in the human airway compared with  
272 SARS-CoV remains to be investigated. It will be interesting to assess this using authentic SARS-CoV-2  
273 containing multibasic cleavage site mutations, which requires a reverse genetic system, not available to  
274 this study at present. Whether cell-cell fusion also plays a role in virus dissemination needs to be  
275 determined. In a cell-cell fusion assay and in organoid-derived human airway cells cultured at air-liquid  
276 interface we show that SARS-CoV-2 is more fusogenic than SARS-CoV and that fusogenicity is  
277 increased by the SARS-CoV-2 S multibasic cleavage site. The role of cell-cell fusion in coronavirus  
278 transmission and pathogenesis has not been investigated in detail, but it could be a strategy to avoid  
279 extracellular immune surveillance and may increase the viral dissemination rate in the airways *in vivo*.  
280 Whether the multibasic cleavage site also affects entry into cells of other organs needs to be investigated

281 further. Although SARS-CoV-2 symptoms are mainly respiratory, recent reports indicate frequent  
282 extrapulmonary manifestations, including but not limited to thrombotic complications, acute kidney injury,  
283 gastrointestinal symptoms, and dermatologic complications (30). Of note, acute kidney injury was  
284 uncommon during the SARS-CoV epidemic (31). It is unclear at this moment whether these  
285 manifestations are the result of extrapulmonary viral replication.

286

287 Using VeroE6-TMPRSS2 cells that have both active serine protease- and cathepsin-mediated entry  
288 pathways, we show that the multibasic cleavage site increases serine protease-mediated S activation,  
289 while decreasing cathepsin-mediated S activation. This indicates that the multibasic cleavage site could  
290 be an adaptation to serine protease-mediated entry. Whether this site improves S activation by any  
291 protease or by serine proteases specifically remains to be tested. Encountering serine proteases first may  
292 result in more plasma membrane entry over endosomal entry. More efficient fusion of multibasic motif  
293 containing S proteins may be caused by increased S2' cleavage due to higher accessibility of a S1/S2  
294 cleaved S compared with an uncleaved S. S1/S2 cleavage was recently shown to increase the binding of  
295 S to ACE2 (32). Structural changes caused by S1/S2 cleavage may affect protease accessibility as well  
296 and may increase subsequent S2' cleavage.

297

298 While mutations in the SARS-CoV-2 multibasic cleavage site decreased airway cell infectivity, they  
299 increased infectivity on VeroE6 cells. Several groups have reported mutations or deletions in or around  
300 the SARS-CoV-2 multibasic cleavage site that arise in cell culture on VeroE6 cells (33-35), indicating that  
301 the lack of a multibasic cleavage site creates a selective advantage in cell culture on VeroE6 cells. The  
302 mechanism behind this remains unknown. The increased infectivity of multibasic cleavage site mutants  
303 was not observed by Hoffmann and colleagues (2020), but in that study complete cleavage motifs  
304 including four amino acids N-terminally from the minimal RXXR cleavage site were exchanged between  
305 SARS-CoV-2 and SARS-CoV (18). In contrast, we mutated single sites or removed/inserted only the  
306 PRRA motif. Importantly, a cell culture adapted virus containing a complete deletion of the multibasic  
307 cleavage site was recently shown to be attenuated in hamsters (35). These studies support our findings

308 that the SARS-CoV-2 multibasic cleavage site affects tropism, facilitates airway cell entry and show that  
309 proper characterization of virus stocks is essential.

310

311 Entry inhibition has been proposed as an effective treatment option for SARS-CoV-2. Chloroquine can  
312 block SARS-CoV and SARS-CoV-2 entry *in vitro* into VeroE6 cells (36, 37), but does not block entry into  
313 cells expressing serine proteases (Calu-3 and Vero-TMPRSS2) (38). This is expected, as chloroquine  
314 acts in the endosome, while the endosomal entry pathway is not utilized in serine protease expressing  
315 cells. As lung cells express serine proteases, inhibitors that block endosomal entry are likely to be  
316 ineffective *in vivo*. These findings highlight that drug screens should be performed directly in relevant cells  
317 to prevent wasting resources. Our study shows that SARS-CoV-2 replication in human airway spheroids  
318 infected with a high MOI is inhibited ~90% by camostat, suggesting that this drug may be effective *in vivo*.  
319 Future studies assessing the efficacy and safety of camostat in animal models should be conducted. For  
320 SARS-CoV, camostat improved survival to 60% in a lethal mouse model (39). In the same study,  
321 inhibition of cathepsins using a cysteine protease inhibitor was ineffective, supporting a critical role for  
322 serine proteases in viral spread and pathogenesis *in vivo*. In Japan, camostat has been clinically  
323 approved to treat chronic pancreatitis, and thus represents a potential therapy for respiratory coronavirus  
324 infections.

325

326 Overall, our findings indicate that the multibasic cleavage motif in the SARS-CoV-2 S protein facilitates  
327 serine protease-mediated airway cell entry, increasing pandemic potential. In addition, our findings using  
328 authentic SARS-CoV-2 in a relevant human airway model suggest that serine protease inhibition is an  
329 effective antiviral strategy, as either a therapy or prophylaxis.

330

## 331 **Materials and Methods**

332

333 *Viruses and cells*

334 Vero, VeroE6, and VeroE6 stable cell lines were maintained in Dulbecco's modified Eagle's medium  
335 (DMEM, Gibco) supplemented with 10% fetal calf serum (FCS), HEPES (20mM, Lonza), sodium  
336 bicarbonate (0.075%, Gibco), penicillin (100 IU/mL) and streptomycin (100 IU/mL) at 37°C in a humidified  
337 CO<sub>2</sub> incubator. Calu-3 and Calu-3 stable cell lines were maintained in Eagle's minimal essential medium  
338 (EMEM, ATCC®) supplemented with 20% FCS, penicillin (100 IU/mL) and streptomycin (100 IU/mL) at  
339 37°C in a humidified CO<sub>2</sub> incubator. HEK-293T cells were cultured in DMEM supplemented with 10% fetal  
340 calf serum (FCS), sodium pyruvate (1mM, Gibco), non-essential amino acids (1X, Lonza), penicillin (100  
341 IU/mL) and streptomycin (100 IU/mL) at 37°C in a humidified CO<sub>2</sub> incubator. TMPRSS2 and GFP1-10  
342 overexpression cells were maintained in medium containing hygromycin (Invitrogen) and geneticin  
343 (Invitrogen), respectively. SARS-CoV-2 (isolate BetaCoV/Munich/BavPat1/2020; European Virus Archive  
344 Global #026V-03883; kindly provided by Dr. C. Drosten) and SARS-CoV (isolate HKU39849) were  
345 propagated on Vero cells in Opti-MEM I (1X) + GlutaMAX (Gibco), supplemented with penicillin (100  
346 IU/mL) and streptomycin (100 IU/mL) at 37°C in a humidified CO<sub>2</sub> incubator. The SARS-CoV-2 isolate  
347 was obtained from a clinical case in Germany, diagnosed after returning from China. Stocks were  
348 produced by infecting cells at a MOI of 0.01 and incubating the cells for 72 hours. The culture supernatant  
349 was cleared by centrifugation and stored in aliquots at -80°C. Stock titers were determined by preparing  
350 10-fold serial dilutions in Opti-MEM I (1X) + GlutaMAX. Aliquots of each dilution were added to  
351 monolayers of 2 × 10<sup>4</sup> VeroE6 cells in the same medium in a 96-well plate. Plates were incubated at 37°C  
352 5% CO<sub>2</sub> for 5 days and then examined for cytopathic effect. The TCID<sub>50</sub> was calculated according to the  
353 method of Spearman & Kärber. All work with infectious SARS-CoV and SARS-CoV-2 was performed in a  
354 Class II Biosafety Cabinet under BSL-3 conditions at Erasmus Medical Center.

355

#### 356 *Isolation, culture and differentiation of human airway stem cells*

357 Adult lung tissue was obtained from residual, tumor-free, material obtained at lung resection surgery for  
358 lung cancer. The Medical Ethical Committee of the Erasmus MC Rotterdam granted permission for this  
359 study (METC 2012-512). Isolation, culture and differentiation was performed as described previously (40)  
360 according to a protocol adapted from Sachs and colleagues (2019) (21). Differentiation time on air-liquid

361 interphase was 10-11 weeks. For this study, we used carefully dissected out bronchial material for the  
362 generation of bronchial airway organoids. Bronchiolar organoids were generated from distal lung  
363 parenchymal material. Tracheal stem cells were collected from tracheal aspirates of intubated preterm  
364 infants (<28 weeks gestational age) (41) and cultured as described before (21). For the tracheal  
365 aspirates, informed consent was obtained from parents and approval was given by the Medical Ethical  
366 Committee (METC no. MEC-2017-302). All donor materials were completely anonymized.

367

### 368 *Authentic virus infection of primary airway cells*

369 To assess differences in syncytium formation, 2D air-liquid interface differentiated airway cultures were  
370 washed three times with 500  $\mu$ L advanced DMEM/F12 (AdDF+++ , Gibco) before inoculation from the  
371 apical side at a MOI of 1 in 200  $\mu$ L AdDF+++ per well. Next, cultures were incubated at 37°C 5% CO<sub>2</sub> for  
372 2 hours before washing 4 times in 500  $\mu$ L AdDF+++. Cultures were washed daily from the apical side with  
373 300  $\mu$ L AdDF+++ to facilitate virus spread. At 72 hours post infection, cells were fixed for  
374 immunofluorescent staining.

375

376 To determine the effect of camostat on SARS-CoV-2 entry, we incubated bronchial or bronchiolar cultures  
377 that were differentiated at air-liquid interface for 10-11 weeks with 100% dispase in the basal  
378 compartment of a 12 mm Transwell insert. After a 10 minute incubation step at 37°C 5% CO<sub>2</sub>, dispase  
379 was removed and cold 500  $\mu$ L AdDF+++ was pipetted onto the apical side of the Transwell to dislodge  
380 the pseudostratified epithelial layer, which was subsequently mechanically sheared by pipetting using a  
381 P1000 tip. The resulting epithelial fragments were washed twice in 5 ml AdDF+++ before treatment with  
382 10 $\mu$ M camostat, 10 $\mu$ M E64D or carrier (DMSO) in Pneumacult (PC) ALI medium (Stemcell) on ice for 1  
383 hour. Next, fragments were infected at a MOI of 2 for 2 hours at 37°C 5% CO<sub>2</sub> in the presence of  
384 inhibitors or DMSO. Subsequently, fragments were washed three times in 5 ml cold AdDF+++ before  
385 being embedded in 30  $\mu$ L BME (Type 2; R&D Systems) per well in a 48-well plate. Approximately 200000  
386 cells were plated per well. After solidification of the BME, 200  $\mu$ L PC was added per well and plates were  
387 incubated at 37°C 5% CO<sub>2</sub>.

388

389 To assess SARS-CoV-2 replication in the presence of camostat, bronchiolar airway spheroids or 2D air-  
390 liquid interface differentiated tracheal airway cultures were infected as described above. For spheroids,  
391 culture medium was collected at the indicated time points and frozen at -80°C. After culture medium  
392 collection, BME droplets containing spheroids were resuspended in 200 µL AdDF+++ and samples were  
393 frozen at -80°C to lyse the cells. To assess 2D air-liquid interface differentiated airway culture replication  
394 kinetics, apical washes were collected at the indicated time points by adding 200 µL AdDF+++ apically,  
395 incubating for 15 minutes at 37°C 5% CO<sub>2</sub> and collecting the sample before storage at -80°C. For virus  
396 titrations using RT-qPCR (38) or TCID<sub>50</sub> determination, samples were thawed and centrifuged at 500 x g  
397 for 3 min. For TCID<sub>50</sub> determination, six replicates were performed per sample.

398

#### 399 *Fixed immunofluorescence microscopy and immunohistochemistry*

400 Transwell inserts were fixed in formalin, permeabilized in 70% ethanol, and blocked for 60 minutes in  
401 10% normal goat serum or 3% bovine serum albumin (BSA) in PBS (blocking buffer). For organoids 0.1%  
402 triton X-100 was added to the blocking buffer to increase antibody penetration. Cells were incubated with  
403 primary antibodies overnight at 4°C in blocking buffer, washed twice with PBS, incubated with  
404 corresponding secondary antibodies Alexa488-, 594 and 647-conjugated secondary antibodies (1:400;  
405 Invitrogen) in blocking buffer for 2 hours at room temperature, washed two times with PBS, incubated with  
406 indicated additional stains (TO-PRO3, phalloidin-633 (SC-363796, Santa Cruz Biotechnology), Hoechst),  
407 washed twice with PBS, and mounted in Prolong Antifade (Invitrogen) mounting medium.

408

409 SARS-CoV-2 and SARS-CoV were stained with mouse-anti-SARS-CoV nucleoprotein (40143-MM05,  
410 1:400, Sino Biological) or rabbit-anti-SARS-CoV nucleoprotein (40143-T62, 1:400, Sino biological). Tight  
411 junctions were stained using mouse-anti-ZO1 (ZO1-1A12, 1:200, Invitrogen). Club cells and goblet cells  
412 were stained with mouse-anti-CC10 (sc-390313 AF594, 1:100, Santa Cruz Biotechnology) and mouse  
413 anti-MUC5AC (MA5-12178, 1:100, Invitrogen), respectively. Ciliated cells were stained with mouse-anti-  
414 FOXJ1 (14-9965-82, 1:200, eBioscience) and mouse-anti-AcTub (sc-23950 AF488, 1:100, Santa Cruz

415 Biotechnology). For lineage marker stainings formalin-fixed inserts were paraffin-embedded, sectioned  
416 and deparaffinized as described before prior to staining (42). Samples were imaged on a LSM700  
417 confocal microscope using ZEN software (Zeiss). Representative images were acquired and shown as Z-  
418 projections, single slices or XZ cross sections.

419

420 Immunohistochemistry was performed as described previously (42) on formalin fixed, paraffin embedded  
421 Transwell inserts. ACE2 and TMPRSS2 were stained using goat-anti-hACE2 (AF933, 1:200, R&D  
422 Systems) and mouse-anti-TMPRSS2 (sc-515727, 1:200, Santa Cruz Biotechnology), and visualized with  
423 rabbit-anti-goat (P0160, 1:200, Dako) and goat-anti-mouse (PO260, 1:100, Dako) horseradish peroxidase  
424 labeled secondary antibody, respectively. Samples were counterstained using haematoxylin.

425

#### 426 *GFP-complementation fusion assay*

427 HEK-293T cells were grown in 6-well format to 70-80% confluency and were transfected with 1.5 µg  
428 pGAGGS-spike (all coronavirus S variants described above) DNA and pGAGGS-β-Actin-P2A-7xGFP11-  
429 BFP DNA or empty vector DNA with PEI in a ratio of 1:3 (DNA:PEI). Beta-actin was tagged with 7xGFP11  
430 expressed in tandem and blue fluorescent protein (BFP). The two genes were separated by a P2A self-  
431 cleaving peptide. Two variants of this construct were used. One variant contained a GSG linker located  
432 N-terminally from the P2A site to improve self-cleavage and this construct was used in qualitative  
433 confocal microscopy experiments. A variant lacking the GSG linker was less efficiently cleaved as  
434 indicated by both cytoplasmic and nuclear localized GFP, but this generated an equal distribution of GFP  
435 throughout the cell and therefore it was used for all fusion assays in which the sum of all GFP+ pixels  
436 was calculated. Transfected HEK-293T cells were incubated overnight at 37°C 5% CO<sub>2</sub>. GFP1-10  
437 expressing cells were seeded in a 12-well plate to achieve 90-100% confluency after overnight incubation  
438 at 37°C 5% CO<sub>2</sub> and medium was refreshed with Opti-MEM I (1X) + GlutaMAX. HEK-293T cells were  
439 resuspended in PBS by pipetting to generate a single cell suspension and added to GFP1-10 expressing  
440 cells in a ratio of 1:80 (HEK-293T cells : GFP1-10 expressing cells). Fusion events were quantified by  
441 detecting GFP+ pixels after 18 hours incubation at 37°C 5% CO<sub>2</sub> using Amersham™ Typhoon™



442 Biomolecular Imager (channel Cy2; resolution 10µm; GE Healthcare). Data was analyzed using the  
443 ImageQuant TL 8.2 image analysis software (GE Healthcare) by calculating the sum of all GFP+ pixels  
444 per well. For nuclear counting fluorescence microscopy images were obtained with a Carl ZEISS Vert.A1  
445 microscope paired with an AxioCam ICm1 camera and Colibri 7 laser (469/38nm for GFP and 365/10nm  
446 for BFP) using ZEN analysis software (20x magnification). Nuclei per syncytia were calculated by  
447 counting BFP-positive nuclei after 18 hours incubation at 37°C 5% CO<sub>2</sub>. Confocal microscopy images  
448 were taken on a LSM700 confocal microscope using ZEN software. Representative images were  
449 acquired and shown as single slices.

450

#### 451 *Coronavirus S pseudotyped particle production*

452 For the production of SARS-CoV and SARS-CoV-2 S PPs, as well as multibasic cleavage site mutant  
453 PPs, HEK-293T cells were transfected with 15 µg S expression plasmids. Twenty-four hours post-  
454 transfection, the medium was replaced for Opti-MEM I (1X) + GlutaMAX, and cells were infected at a MOI  
455 of 1 with VSV-G PPs. Two hours post-infection, cells were washed three times with Opti-MEM I (1X) +  
456 GlutaMAX and replaced with medium containing anti-VSV-G neutralizing antibody (clone 8G5F11;  
457 Absolute Antibody) at a dilution of 1:50000 to block remaining VSV-G PPs. The supernatant was  
458 collected after 24 hours, cleared by centrifugation at 2000 x g for 5 minutes and stored at 4°C until use  
459 within 7 days. Coronavirus S PPs were titrated on VeroE6 cells as described in the supplementary  
460 information (SI) appendix.

461

#### 462 *Entry route assay*

463 VeroE6, Calu-3 and VeroE6-TMPRSS2 cells were seeded in 24 well plates and kept at 37°C 5% CO<sub>2</sub>  
464 overnight to achieve 80-100% confluency by the next day. Cells were pretreated with a concentration  
465 range of camostat, E64D or DMSO (with all conditions containing equal concentrations of DMSO) in Opti-  
466 MEM I (1X) + GlutaMAX for 2 hours before infecting with on average 1000 PPs per well. Plates were  
467 incubated overnight at 37°C 5% CO<sub>2</sub> before scanning for GFP signal as described above.

468

469 *Entry speed assay*

470 Calu-3 cells were seeded as for entry route assays and pre-treated with 10 $\mu$ M E64D. After one hour, PPs  
471 were added per well to achieve 1000 infected cells in the control well. At the same time as addition of  
472 PPs, 10 $\mu$ M camostat was added into the first set of wells (t=0). DMSO was added to controls. The same  
473 inhibitor was added in the next sets of wells in triplicate 2, 4 and 6 hours post infection. Plates were  
474 incubated overnight at 37°C 5% CO<sub>2</sub> before scanning for GFP signal as described above.

475

476 Authentic virus entry speed was performed in the same manner, by infecting Calu-3 cells with 1x10<sup>4</sup>  
477 TCID<sub>50</sub> SARS-CoV-2 and 5x10<sup>4</sup> TCID<sub>50</sub> SARS-CoV. After 12 hours, plates were fixed and blocked as  
478 above for transwell inserts. Cells were incubated with mouse-anti-double stranded RNA (Clone J2, 1:500,  
479 Scicons) in blocking buffer for 2 hours at room temperature or overnight at 4°C. Cells were washed twice  
480 with PBS and stained with Alexa488 conjugated secondary antibody (1:500 Invitrogen) in blocking buffer  
481 for an hour at room temperature. Finally, cells were washed twice with PBS and scanned in PBS on the  
482 Amersham™ Typhoon as described above.

483

484 *Coronavirus S pseudotyped particle concentration*

485 PPs were concentrated on a 10% sucrose cushion (10% sucrose, 15mM Tris-HCl, 100mM NaCl, 0.5mM  
486 EDTA) at 20000g for 1.5 hours at 4°C. Supernatant was decanted and pellet was resuspended overnight  
487 at 4°C in Opti-MEM I (1X) + GlutaMAX to achieve 100-fold concentration. PPs were titrated and aliquots  
488 were lysed in 1X Laemmli buffer (Bio-Rad) containing 5% 2-mercaptoethanol for western blot analysis.

489

490 *Pseudoparticle infection of primary airway cells*

491 To determine the effect of multibasic cleavage site mutations on SARS-CoV-2 entry, we obtained airway  
492 culture fragments from 2D differentiated bronchiolar cultures as described above. Next, fragments were  
493 infected with equal volumes of concentrated wild type and multibasic cleavage site mutant PPs for 2  
494 hours at 37°C 5% CO<sub>2</sub>. Subsequently, the supernatant was replaced with 30  $\mu$ L BME and plated in a 48-  
495 well plate. Approximately 200000 cells were plated per well. After solidification of the BME, 200  $\mu$ L PC

496 was added per well and plates were incubated at 37°C 5% CO<sub>2</sub>. After overnight incubation, the amount of  
497 infected cells and organoids per field were counted and images taken using a Carl ZEISS Vert.A1  
498 microscope paired with an AxioCam ICm1 camera and Colibri 7 laser (469/38nm for GFP) using ZEN  
499 analysis software.

500

#### 501 *Statistical analysis*

502 Statistical analysis was performed with the GraphPad Prism 5 and 8 software using a t-test, one way  
503 ANOVA or two-way ANOVA followed by a Bonferroni multiple-comparison test.

504

505 Additional experimental methods, including cloning, stable cell line generation, VSV delta G rescue,  
506 western blotting and silver staining, can be found in the SI appendix.

#### 507 **Acknowledgments**

508

509 This work was supported by NWO Grant 022.005.032, partly financed by the Netherlands Organization  
510 for Health Research and Development (ZONMW) grant agreement 10150062010008 to B.L.H and co-  
511 funded by the PPP Allowance (grant agreement LSHM19136) made available by Health Holland, Top  
512 Sector Life Sciences & Health, to stimulate public-private partnerships.

513

#### 514 **References**

- 515 1. Zhu N, *et al.* (2020) A Novel Coronavirus from Patients with Pneumonia in China, 2019. *N Engl J*  
516 *Med* 382(8):727-733.
- 517 2. Peiris JS, *et al.* (2003) Coronavirus as a possible cause of severe acute respiratory syndrome.  
518 *Lancet* 361(9366):1319-1325.
- 519 3. Kuiken T, *et al.* (2003) Newly discovered coronavirus as the primary cause of severe acute  
520 respiratory syndrome. *Lancet* 362(9380):263-270.
- 521 4. Drosten C, *et al.* (2003) Identification of a novel coronavirus in patients with severe acute  
522 respiratory syndrome. *N Engl J Med* 348(20):1967-1976.
- 523 5. Zaki AM, van Boheemen S, Bestebroer TM, Osterhaus AD, & Fouchier RA (2012) Isolation of a  
524 novel coronavirus from a man with pneumonia in Saudi Arabia. *N Engl J Med* 367(19):1814-  
525 1820.

- 526 6. Wang Q, *et al.* (2014) Bat origins of MERS-CoV supported by bat coronavirus HKU4 usage of  
527 human receptor CD26. *Cell Host Microbe* 16(3):328-337.
- 528 7. Lau SK, *et al.* (2010) Ecoepidemiology and complete genome comparison of different strains of  
529 severe acute respiratory syndrome-related Rhinolophus bat coronavirus in China reveal bats as a  
530 reservoir for acute, self-limiting infection that allows recombination events. *J Virol* 84(6):2808-  
531 2819.
- 532 8. Hu B, Ge X, Wang LF, & Shi Z (2015) Bat origin of human coronaviruses. *Virology* 12:221.
- 533 9. Hulswit RJ, de Haan CA, & Bosch BJ (2016) Coronavirus Spike Protein and Tropism Changes. *Adv*  
534 *Virus Res* 96:29-57.
- 535 10. Millet JK & Whittaker GR (2015) Host cell proteases: Critical determinants of coronavirus  
536 tropism and pathogenesis. *Virus Res* 202:120-134.
- 537 11. Belouzard S, Millet JK, Licitra BN, & Whittaker GR (2012) Mechanisms of coronavirus cell entry  
538 mediated by the viral spike protein. *Viruses* 4(6):1011-1033.
- 539 12. Menachery VD, *et al.* (2020) Trypsin Treatment Unlocks Barrier for Zoonotic Bat Coronavirus  
540 Infection. *J Virol* 94(5).
- 541 13. Yang Y, *et al.* (2014) Receptor usage and cell entry of bat coronavirus HKU4 provide insight into  
542 bat-to-human transmission of MERS coronavirus. *Proc Natl Acad Sci U S A* 111(34):12516-12521.
- 543 14. Yang Y, *et al.* (2015) Two Mutations Were Critical for Bat-to-Human Transmission of Middle East  
544 Respiratory Syndrome Coronavirus. *J Virol* 89(17):9119-9123.
- 545 15. Walls AC, *et al.* (2020) Structure, Function, and Antigenicity of the SARS-CoV-2 Spike  
546 Glycoprotein. *Cell* 181(2):281-292 e286.
- 547 16. Wrapp D, *et al.* (2020) Cryo-EM structure of the 2019-nCoV spike in the prefusion conformation.  
548 *Science* 367(6483):1260-1263.
- 549 17. Park JE, *et al.* (2016) Proteolytic processing of Middle East respiratory syndrome coronavirus  
550 spikes expands virus tropism. *Proc Natl Acad Sci U S A* 113(43):12262-12267.
- 551 18. Hoffmann M, Kleine-Weber H, & Pohlmann S (2020) A Multibasic Cleavage Site in the Spike  
552 Protein of SARS-CoV-2 Is Essential for Infection of Human Lung Cells. *Mol Cell* 78(4):779-784  
553 e775.
- 554 19. Shang J, *et al.* (2020) Cell entry mechanisms of SARS-CoV-2. *Proc Natl Acad Sci U S A*  
555 117(21):11727-11734.
- 556 20. Hoffmann M, *et al.* (2020) SARS-CoV-2 Cell Entry Depends on ACE2 and TMPRSS2 and Is Blocked  
557 by a Clinically Proven Protease Inhibitor. *Cell* 181(2):271-280 e278.
- 558 21. Sachs N, *et al.* (2019) Long-term expanding human airway organoids for disease modeling.  
559 *EMBO J* 38(4).
- 560 22. Follis KE, York J, & Nunberg JH (2006) Furin cleavage of the SARS coronavirus spike glycoprotein  
561 enhances cell-cell fusion but does not affect virion entry. *Virology* 350(2):358-369.
- 562 23. Cheng PK, *et al.* (2004) Viral shedding patterns of coronavirus in patients with probable severe  
563 acute respiratory syndrome. *Lancet* 363(9422):1699-1700.
- 564 24. Peiris JS, *et al.* (2003) Clinical progression and viral load in a community outbreak of coronavirus-  
565 associated SARS pneumonia: a prospective study. *Lancet* 361(9371):1767-1772.
- 566 25. Kimball A, *et al.* (2020) Asymptomatic and Presymptomatic SARS-CoV-2 Infections in Residents  
567 of a Long-Term Care Skilled Nursing Facility - King County, Washington, March 2020. *MMWR*  
568 *Morb Mortal Wkly Rep* 69(13):377-381.
- 569 26. Huang L, *et al.* (2020) Rapid asymptomatic transmission of COVID-19 during the incubation  
570 period demonstrating strong infectivity in a cluster of youngsters aged 16-23 years outside

- 571 Wuhan and characteristics of young patients with COVID-19: A prospective contact-tracing  
572 study. *J Infect* 80(6):e1-e13.
- 573 27. Wei WE, *et al.* (2020) Presymptomatic Transmission of SARS-CoV-2 - Singapore, January 23-  
574 March 16, 2020. *MMWR Morb Mortal Wkly Rep* 69(14):411-415.
- 575 28. Bai Y, *et al.* (2020) Presumed Asymptomatic Carrier Transmission of COVID-19. *JAMA*.
- 576 29. Wiersinga WJ, Rhodes A, Cheng AC, Peacock SJ, & Prescott HC (2020) Pathophysiology,  
577 Transmission, Diagnosis, and Treatment of Coronavirus Disease 2019 (COVID-19): A Review.  
578 *JAMA*.
- 579 30. Gupta A, *et al.* (2020) Extrapulmonary manifestations of COVID-19. *Nat Med* 26(7):1017-1032.
- 580 31. Chu KH, *et al.* (2005) Acute renal impairment in coronavirus-associated severe acute respiratory  
581 syndrome. *Kidney Int* 67(2):698-705.
- 582 32. Wrobel AG, *et al.* (2020) SARS-CoV-2 and bat RaTG13 spike glycoprotein structures inform on  
583 virus evolution and furin-cleavage effects. *Nat Struct Mol Biol*.
- 584 33. Ogando NS, *et al.* (2020) SARS-coronavirus-2 replication in Vero E6 cells: replication kinetics,  
585 rapid adaptation and cytopathology. *J Gen Virol*.
- 586 34. Klimstra WB, *et al.* (2020) SARS-CoV-2 growth, furin-cleavage-site adaptation and neutralization  
587 using serum from acutely infected, hospitalized COVID-19 patients. *bioRxiv*.
- 588 35. Lau SY, *et al.* (2020) Attenuated SARS-CoV-2 variants with deletions at the S1/S2 junction. *Emerg*  
589 *Microbes Infect* 9(1):837-842.
- 590 36. Vincent MJ, *et al.* (2005) Chloroquine is a potent inhibitor of SARS coronavirus infection and  
591 spread. *Virol J* 2:69.
- 592 37. Wang M, *et al.* (2020) Remdesivir and chloroquine effectively inhibit the recently emerged novel  
593 coronavirus (2019-nCoV) in vitro. *Cell Res* 30(3):269-271.
- 594 38. Hoffmann M, *et al.* (2020) Chloroquine does not inhibit infection of human lung cells with SARS-  
595 CoV-2. *Nature*.
- 596 39. Zhou Y, *et al.* (2015) Protease inhibitors targeting coronavirus and filovirus entry. *Antiviral Res*  
597 116:76-84.
- 598 40. Lamers MM, *et al.* (2020) SARS-CoV-2 productively infects human gut enterocytes. *Science*.
- 599 41. Eenjes E, *et al.* (2020) Disease modelling following organoid-based expansion of airway epithelial  
600 cells. *In revision*.
- 601 42. Rockx B, *et al.* (2020) Comparative pathogenesis of COVID-19, MERS, and SARS in a nonhuman  
602 primate model. *Science*.

603

## 604 **Figures and Tables**

605

606 **Figure 1. The SARS-CoV-2 S multibasic cleavage site mediates entry into organoid-derived human**  
607 **airway cells.** (A) Schematic overview of SARS-CoV-2 S protein mutants. Multibasic cleavage site  
608 residues are indicated in red; amino acid substitutions are indicated in green. Red arrows indicate  
609 cleavage sites. RBD = receptor binding domain, RBM = receptor binding motif. The SARS-CoV-2 S

610 multibasic cleavage site was mutated to either remove the PRRA motif (SARS-2-Del-PRRA) or to  
611 substitute the R685 site (SARS-2-R685A and R685H). (B) Comparison of S cleavage of SARS-CoV-2  
612 PPs and the multibasic cleavage site mutants. Western blots were performed against S1 with VSV-M  
613 silver stains as a production control. (C and D) PP infectivity of SARS-CoV-2 S and multibasic cleavage  
614 site mutants on VeroE6 (C) and Calu-3 (D) cells. (E) Differentiated airway spheroid cultures were infected  
615 with concentrated SARS-CoV-2 PPs containing a GFP reporter, indicated in green. Scale bar indicates 20  
616  $\mu\text{m}$ . (F) SARS-CoV-2 PP and multibasic cleavage site mutant infectivity on differentiated bronchiolar  
617 airway spheroid cultures. One-way ANOVA was performed for statistical analysis comparing all groups  
618 with SARS-CoV-2 PPs. \*  $P < 0.05$ . Error bars indicate SEM. PP = pseudoparticles. Experiments were  
619 performed in triplicate (C and D, F). Representative experiments from at least two independent  
620 experiments are shown.

621

622 **Figure 2. SARS-CoV-2 enters faster on Calu-3 cells than SARS-CoV and entry speed is increased**  
623 **by the multibasic cleavage site.** (A) SARS-CoV PP and SARS-CoV-2 PP infectivity on VeroE6 and  
624 Calu-3 cells. (B and C) SARS-CoV PP and SARS-CoV-2 PP entry route on Calu-3 cells. Cells were  
625 pretreated with a concentration range of camostat (B) or E64D (C) to inhibit serine proteases and  
626 cathepsins, respectively. T-test was performed for statistical analysis at the highest concentration. \*  
627  $P < 0.05$ . (D and E) SARS-CoV PP, SARS-CoV-2 PP (D) and authentic virus (E) entry speed on Calu-3  
628 cells. T-test was performed for statistical analysis at the latest time point. \*  $P < 0.05$ . (F) Schematic  
629 overview of SARS-CoV S protein mutants. Multibasic cleavage site residues are indicated in red. The  
630 SARS-CoV-2 PRRA motif was inserted into SARS-CoV PPs (SARS-PRRA). (G) Comparison of S1  
631 cleavage of SARS-CoV PP and the multibasic cleavage site mutant. VSV-M silver stains are shown as a  
632 production control. (H and I) SARS-CoV PP, SARS-PRRA PP and SARS-CoV-2 PP entry route on Calu-3  
633 cells. Cells were pretreated with a concentration range of camostat (H) or E64D (I) to inhibit plasma  
634 membrane and endosomal entry respectively. One-way ANOVA was performed for statistical analysis  
635 comparing all groups with SARS-CoV PPs at the highest concentration. \*  $P < 0.05$ . (J and K) Entry speed  
636 on Calu-3 cells of SARS-CoV PPs compared with SARS-PRRA PPs (J) and SARS-CoV-2 PPs compared

637 with SARS-2-Del-PRRA PPs (*K*). T-test was performed for statistical analysis at the latest time point. \*  
638  $P < 0.05$ . Error bars indicate SEM. PP = pseudoparticles. Experiments were performed in triplicate (*A* to *E*,  
639 *H* to *K*). Representative experiments from at least two independent experiments are shown.

640

641

642 **Figure 3. The SARS-CoV-2 multibasic cleavage site facilitates cell-cell fusion and SARS-CoV-2 is**  
643 **more fusogenic than SARS-CoV on differentiated organoid-derived human airway cells. (A)**

644 Proteolytic cleavage of SARS-CoV-2 S, SARS-CoV S, and S mutants was assessed by overexpression in  
645 HEK-293T cells and subsequent western blots for S1. GAPDH was used as a loading control. (*B* and *C*)  
646 Fusogenicity of SARS-CoV-2 S, SARS-CoV S, and S mutants was assessed after 18 hours by counting  
647 the number of nuclei per syncytium (*B*) and by measuring the sum of all GFP+ pixels per well (*C*).

648 Statistical analysis was performed by one-way ANOVA on SARS-CoV or SARS-CoV-2 S-mediated fusion  
649 compared with its respective mutants. \*  $P < 0.05$  (*C*). (*D*) Differentiated bronchiolar airway cultures were  
650 infected at a MOI of 1 with SARS-CoV or SARS-CoV-2. 72 hours post infection they were fixed and  
651 stained for nucleoprotein (NP; green) and tight junctions (ZO1; red) to image syncytia. Nuclei were  
652 stained with hoechst (blue). Scale bars indicate 20  $\mu\text{m}$ . Arrows indicate syncytial cells. (*E*) Percentage of  
653 syncytial cells of total number of infected cells per field of 0.1 square mm. 5 fields were counted. T-test  
654 was performed for statistical analysis. \*  $P < 0.05$ . Error bars indicate SEM. Experiments were performed in  
655 triplicate (*C*). Representative experiments from at least two independent experiments are shown.

656

657 **Figure 4. The SARS-CoV-2 multibasic cleavage site increases serine protease usage. (A and B)**

658 SARS-CoV PP and SARS-CoV-2 PP entry route on VeroE6 cells pretreated with a concentration range of  
659 camostat (*A*) or E64D (*B*) to inhibit serine proteases and cathepsins, respectively. (*C* and *D*) SARS-CoV  
660 PP and SARS-CoV-2 PP entry route on VeroE6-TMPRSS2 cells pretreated with a concentration range of  
661 camostat (*C*) or E64D (*D*) to inhibit serine proteases and cathepsins, respectively. T-test was performed  
662 for statistical analysis at the highest concentration. \*  $P < 0.05$ . (*E* and *F*) Entry route of SARS-CoV-2 PP

663 and multibasic cleavage site mutants on VeroE6-TMPRSS2 cells pretreated with a concentration range of  
664 camostat (*E*) or E64D (*F*) to inhibit serine proteases and cathepsins, respectively. One-way ANOVA was  
665 performed for statistical analysis comparing all groups to SARS-CoV-2 PPs at the highest concentration. \*  
666  $P < 0.05$ . (*G* and *H*) Entry route of SARS-CoV PPs and SARS-PRRA PPs on VeroE6-TMPRSS2 cells  
667 pretreated with a concentration range of camostat (*G*) and E64D (*H*) to inhibit serine proteases and  
668 cathepsins, respectively. One-way ANOVA was performed for statistical analysis comparing all groups to  
669 SARS-PRRA PPs at the highest concentration. \*  $P < 0.05$ . Error bars indicate SEM. PP = pseudoparticles.  
670 Representative experiments in triplicate from at least two independent experiments are shown.

671

672 **Figure 5. SARS-CoV-2 entry and replication is dependent on serine proteases in differentiated**  
673 **organoid-derived human airway cells.** (*A* and *B*) Differentiated bronchiolar (*A*) or bronchial (*B*) airway  
674 spheroid cultures were infected at a MOI of 2. 16 hours (*A*) or 24 hours (*B*) post infection they were fixed  
675 and stained for viral nucleoprotein (red). Nuclei were stained with hoechst (blue) and actin was stained  
676 using phalloidin (white). AcTub stains ciliated cells (green). Scale bars indicate 200  $\mu\text{m}$  in *A* and 50  $\mu\text{m}$  in  
677 *B*. Representative images are shown from two independent experiments. (*C* to *E*) Replication kinetics of  
678 SARS-CoV-2 in bronchiolar airway spheroid cultures pretreated with camostat or carrier (DMSO). (*C* and  
679 *D*) TCID50 equivalent (eq.) per ml are shown in culture medium (*C*) and lysed organoids (*D*). (*E*) Live  
680 virus titers (TCID50/ml) in lysed organoids. Dotted line indicates limit of detection. (*F*) Replication kinetics  
681 of SARS-CoV-2 in 2D tracheal air-liquid interface airway cultures pretreated with camostat or carrier  
682 (DMSO). TCID50 eq. per ml in apical washes are shown. Error bars indicate SEM. H p.i. = hours post  
683 infection. Two-way ANOVA was performed for statistical analysis. \*  $P < 0.05$ .



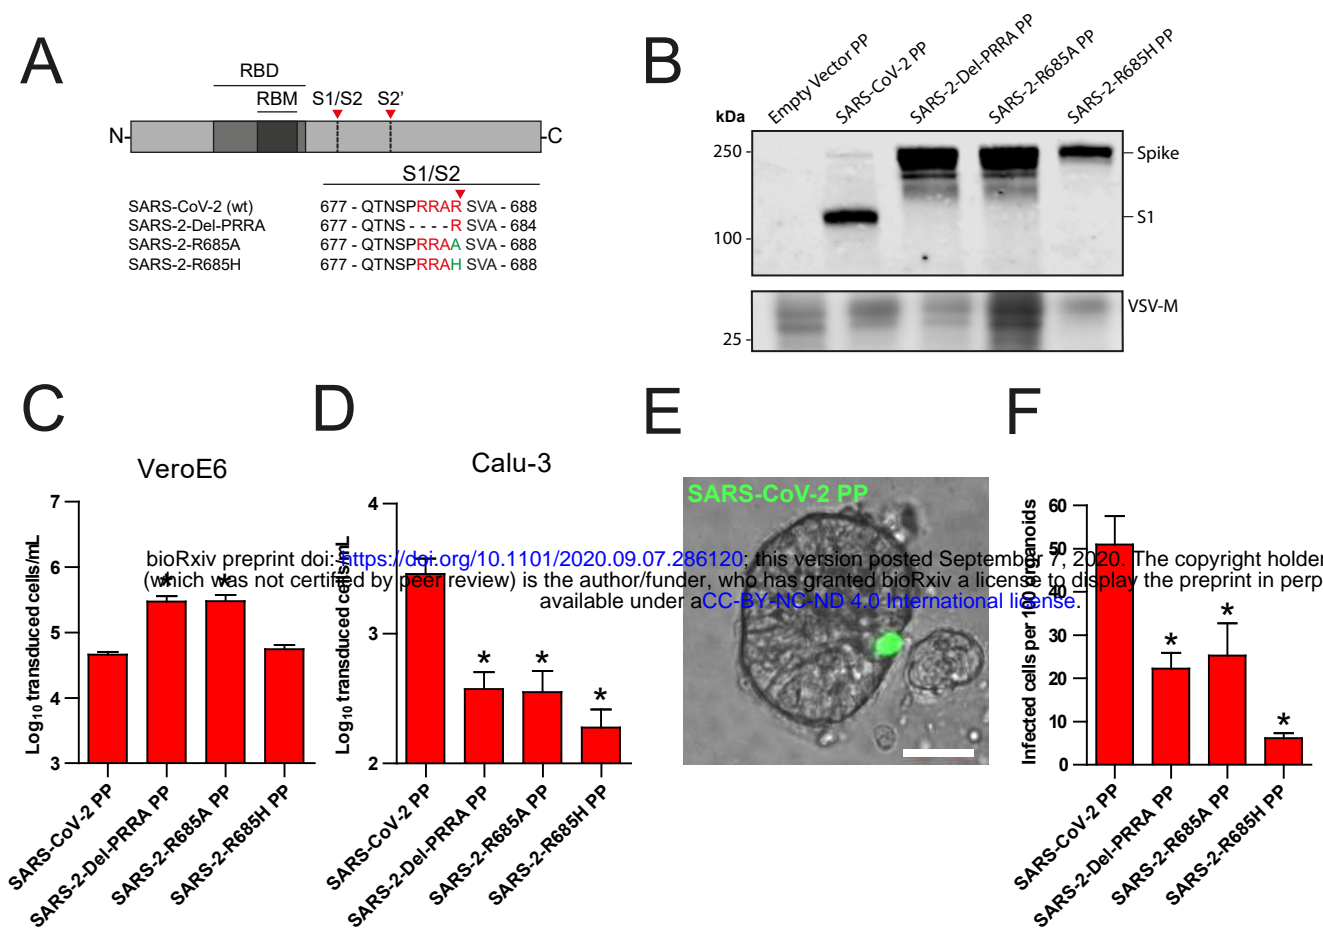

**Figure 1. The SARS-CoV-2 S multibasic cleavage site mediates entry into organoid-derived human airway cells.** (A) Schematic overview of SARS-CoV-2 S protein mutants. Multibasic cleavage site residues are indicated in red; amino acid substitutions are indicated in green. Red arrows indicate cleavage sites. RBD = receptor binding domain, RBM = receptor binding motif. The SARS-CoV-2 S multibasic cleavage site was mutated to either remove the PRRA motif (SARS-2-Del-PRRA) or to substitute the R685 site (SARS-2-R685A and R685H). (B) Comparison of S cleavage of SARS-CoV-2 PPs and the multibasic cleavage site mutants. Western blots were performed against S1 with VSV-M silver stains as a production control. (C and D) PP infectivity of SARS-CoV-2 S and multibasic cleavage site mutants on VeroE6 (C) and Calu-3 (D) cells. (E) Differentiated airway spheroid cultures were infected with concentrated SARS-CoV-2 PPs containing a GFP reporter, indicated in green. Scale bar indicates 20  $\mu$ m. (F) SARS-CoV-2 PP and multibasic cleavage site mutant infectivity on differentiated airway spheroid cultures. One-way ANOVA was performed for statistical analysis comparing all groups with SARS-CoV-2 PPs. \*  $P < 0.05$ . Error bars indicate SEM. PP = pseudoparticles. Experiments were performed in triplicate (C and D, F). Representative experiments from at least two independent experiments are shown.

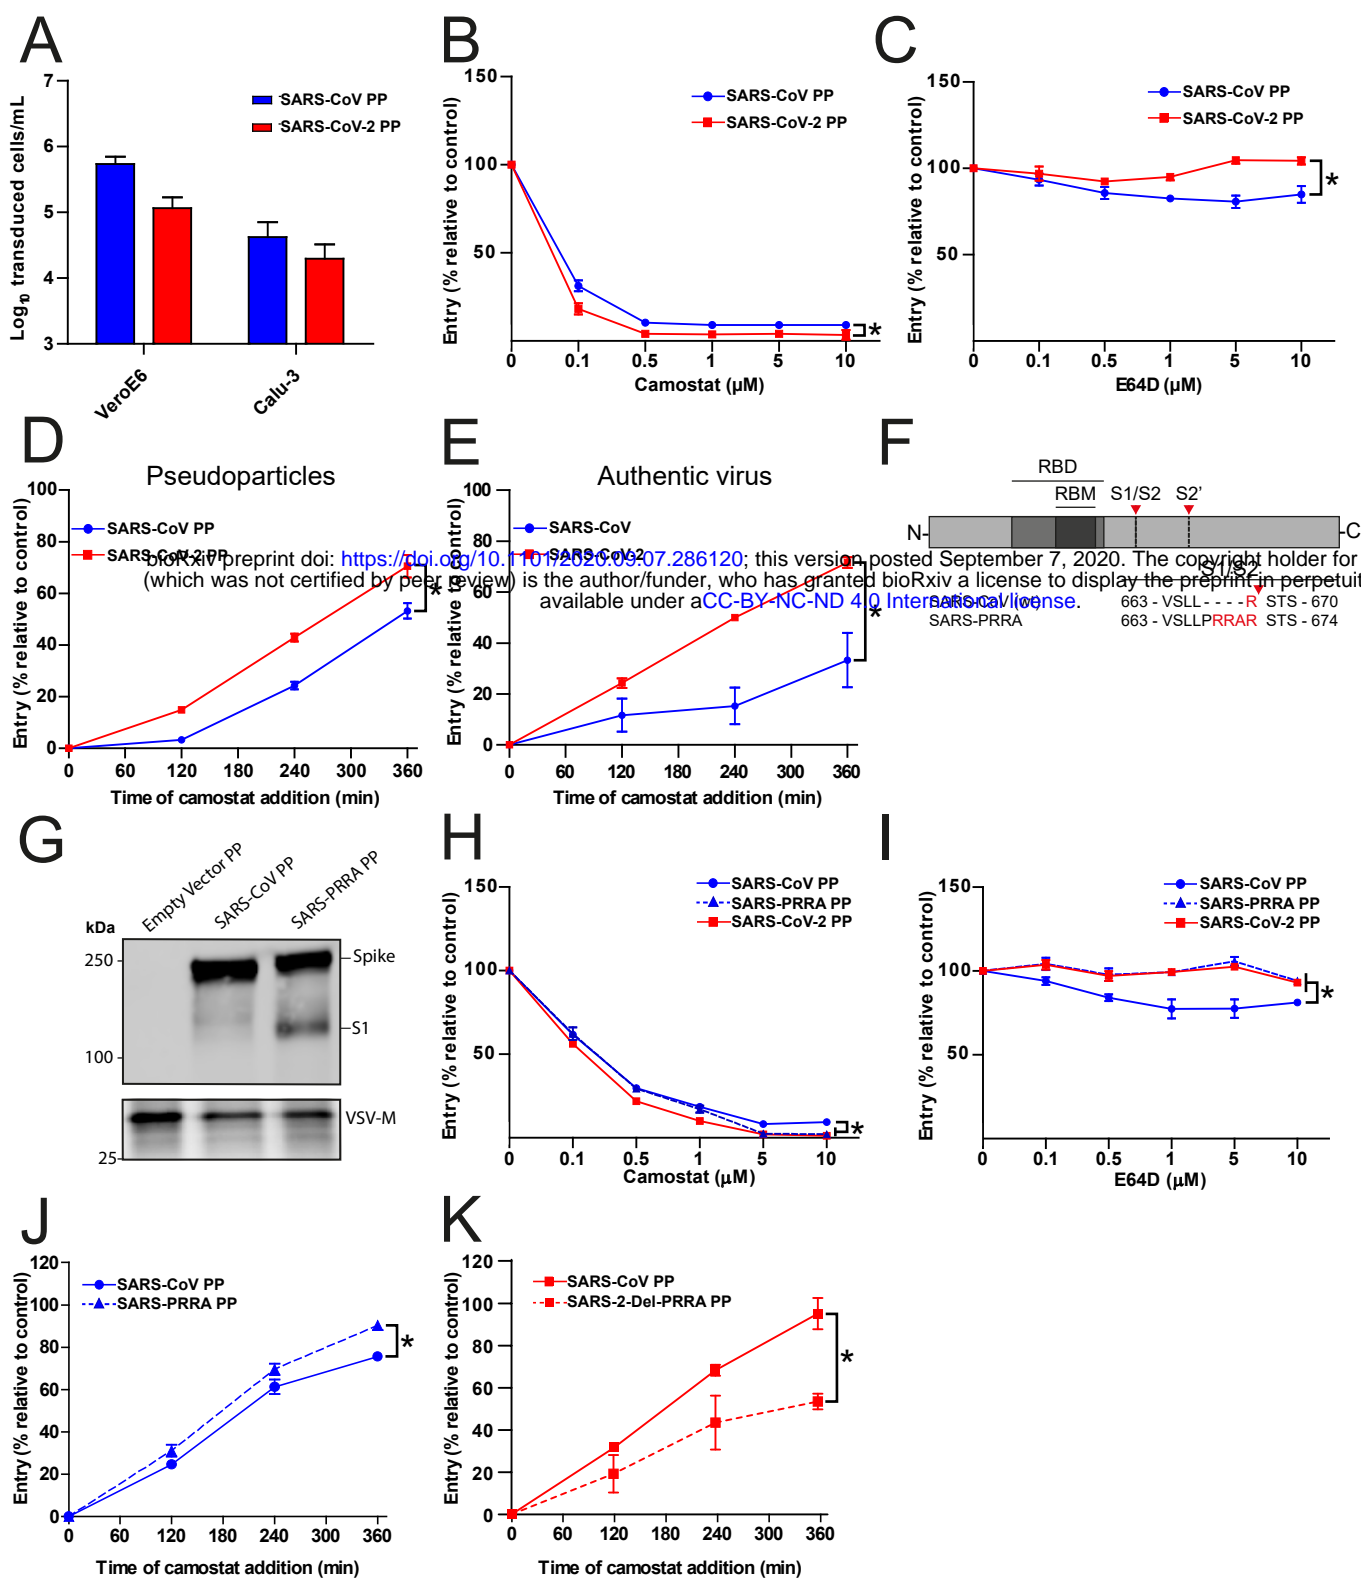

**Figure 2. SARS-CoV-2 enters faster on Calu-3 cells than SARS-CoV and entry speed is increased by the multibasic cleavage site.** (A) SARS-CoV PP and SARS-CoV-2 PP infectivity on VeroE6 and Calu-3 cells. (B and C) SARS-CoV PP and SARS-CoV-2 PP entry route on Calu-3 cells. Cells were pretreated with a concentration range of camostat (B) or E64D (C) to inhibit serine proteases and cathepsins, respectively. T-test was performed for statistical analysis at the highest concentration. \*  $P < 0.05$ . (D and E) SARS-CoV PP, SARS-CoV-2 PP (D) and authentic virus (E) entry speed on Calu-3 cells. T-test was performed for statistical analysis at the latest time point. \*  $P < 0.05$ . (F) Schematic overview of SARS-CoV S protein mutants. Multibasic cleavage site residues are indicated in red. The SARS-CoV-2 PRRA motif was inserted into SARS-CoV PPs (SARS-PRRA). (G) Comparison of S1 cleavage of SARS-CoV PP and the multibasic cleavage site mutant. VSV-M silver stains are shown as a production control. (H and I) SARS-CoV PP, SARS-PRRA PP and SARS-CoV-2 PP entry route on Calu-3 cells. Cells were pretreated with a concentration range of camostat (H) or E64D (I) to inhibit plasma membrane and endosomal entry respectively. One-way ANOVA was performed for statistical analysis comparing all groups with SARS-CoV PPs at the highest concentration. \*  $P < 0.05$ . (J and K) Entry speed on Calu-3 cells of SARS-CoV PPs compared with SARS-PRRA PPs (J) and SARS-CoV-2 PPs compared with SARS-2-Del-PRRA PPs (K). T-test was performed for statistical analysis at the latest time point. \*  $P < 0.05$ . Error bars indicate SEM. PP = pseudoparticles. Experiments were performed in triplicate (A to E, H to K). Representative experiments from at least two independent experiments are shown.

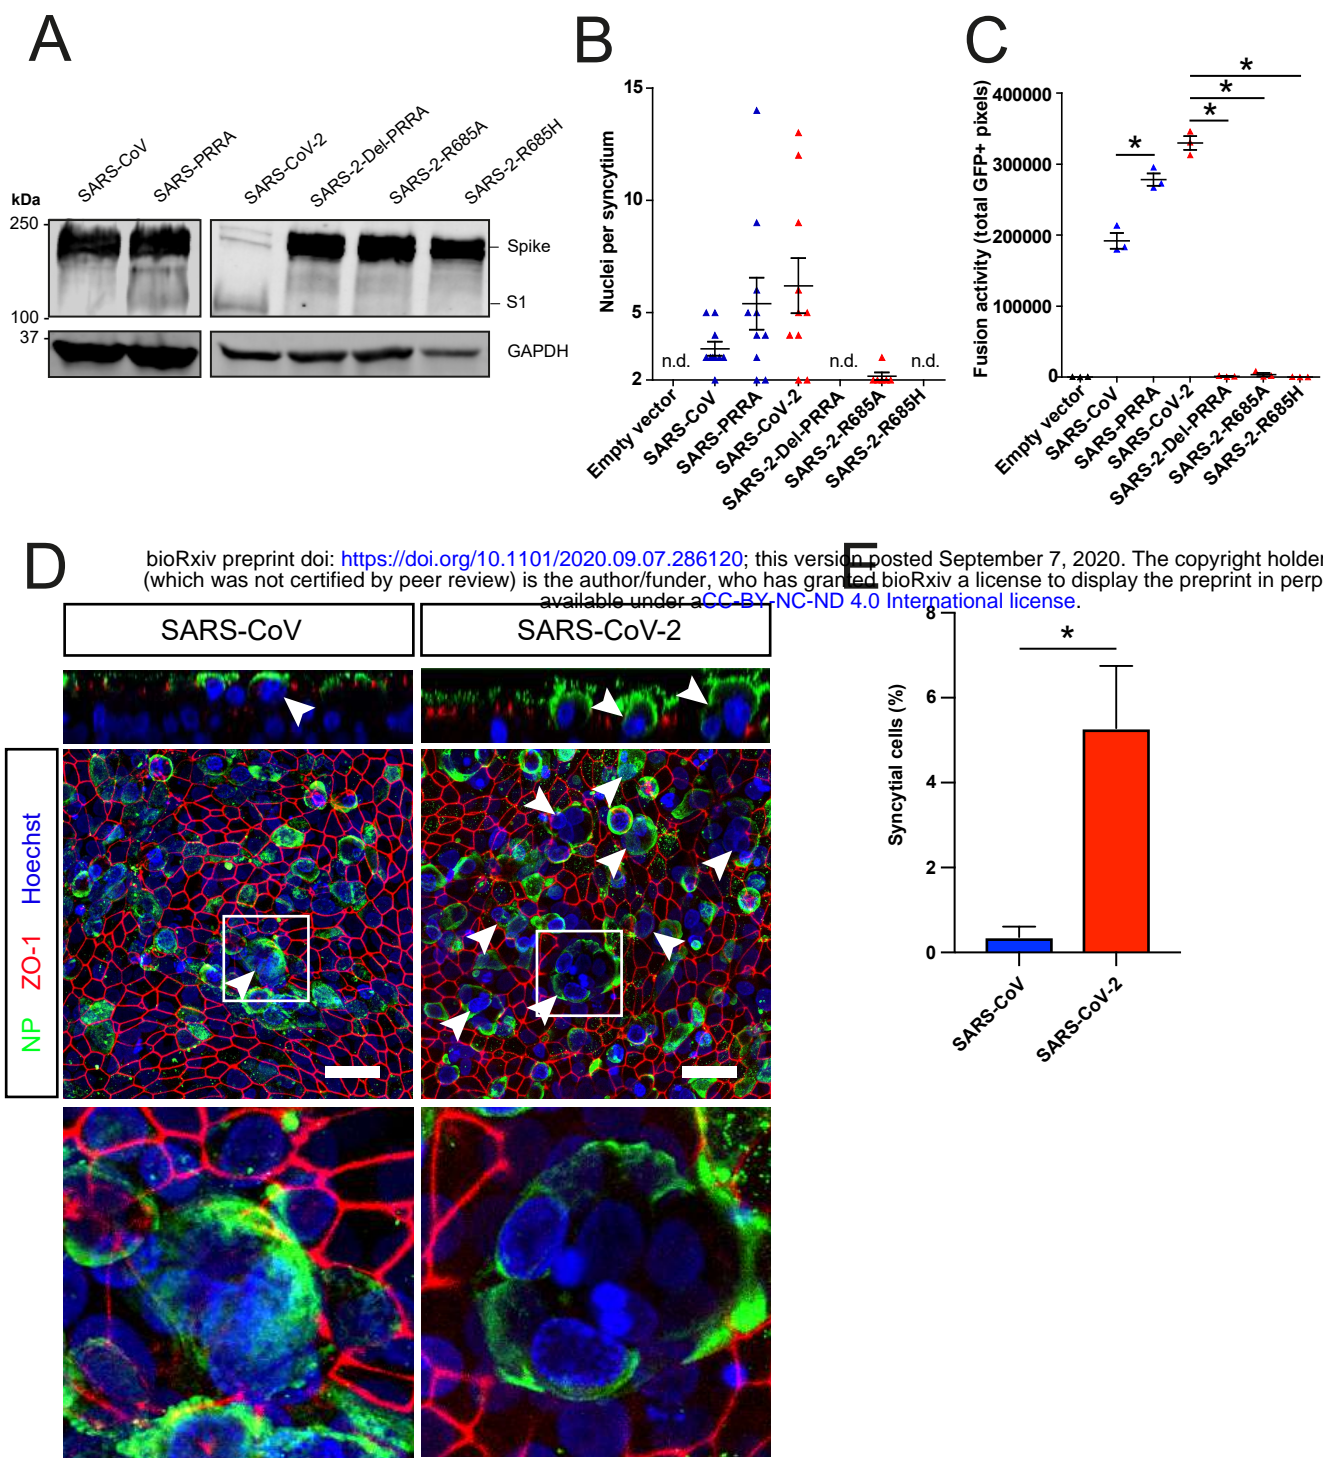

**Figure 3. The SARS-CoV-2 multibasic cleavage site facilitates cell-cell fusion and SARS-CoV-2 is more fusogenic than SARS-CoV on differentiated organoid-derived human airway cells.** (A) Proteolytic cleavage of SARS-CoV-2 S, SARS-CoV S, and S mutants was assessed by overexpression in HEK-293T cells and subsequent western blots for S1. GAPDH was used as a loading control. (B and C) Fusogenicity of SARS-CoV-2 S, SARS-CoV S, and S mutants was assessed after 18 hours by counting the number of nuclei per syncytium (B) and by measuring the sum of all GFP+ pixels per well (C). Statistical analysis was performed by one-way ANOVA on SARS-CoV or SARS-CoV-2 S-mediated fusion compared with its respective mutants. \*  $P < 0.05$  (C). (D) Differentiated airway cultures were infected at a MOI of 1 with SARS-CoV or SARS-CoV-2. 72 hours post infection they were fixed and stained for nucleoprotein (NP; green) and tight junctions (ZO1; red) to image syncytia. Nuclei were stained with hoechst (blue). Scale bars indicate 20  $\mu\text{m}$ . Arrows indicate syncytial cells. (E) Percentage of syncytial cells of total number of infected cells per field of 0.1 square mm. 5 fields were counted. T-test was performed for statistical analysis. \*  $P < 0.05$ . Error bars indicate SEM. Experiments were performed in triplicate (C). Representative experiments from at least two independent experiments are shown.

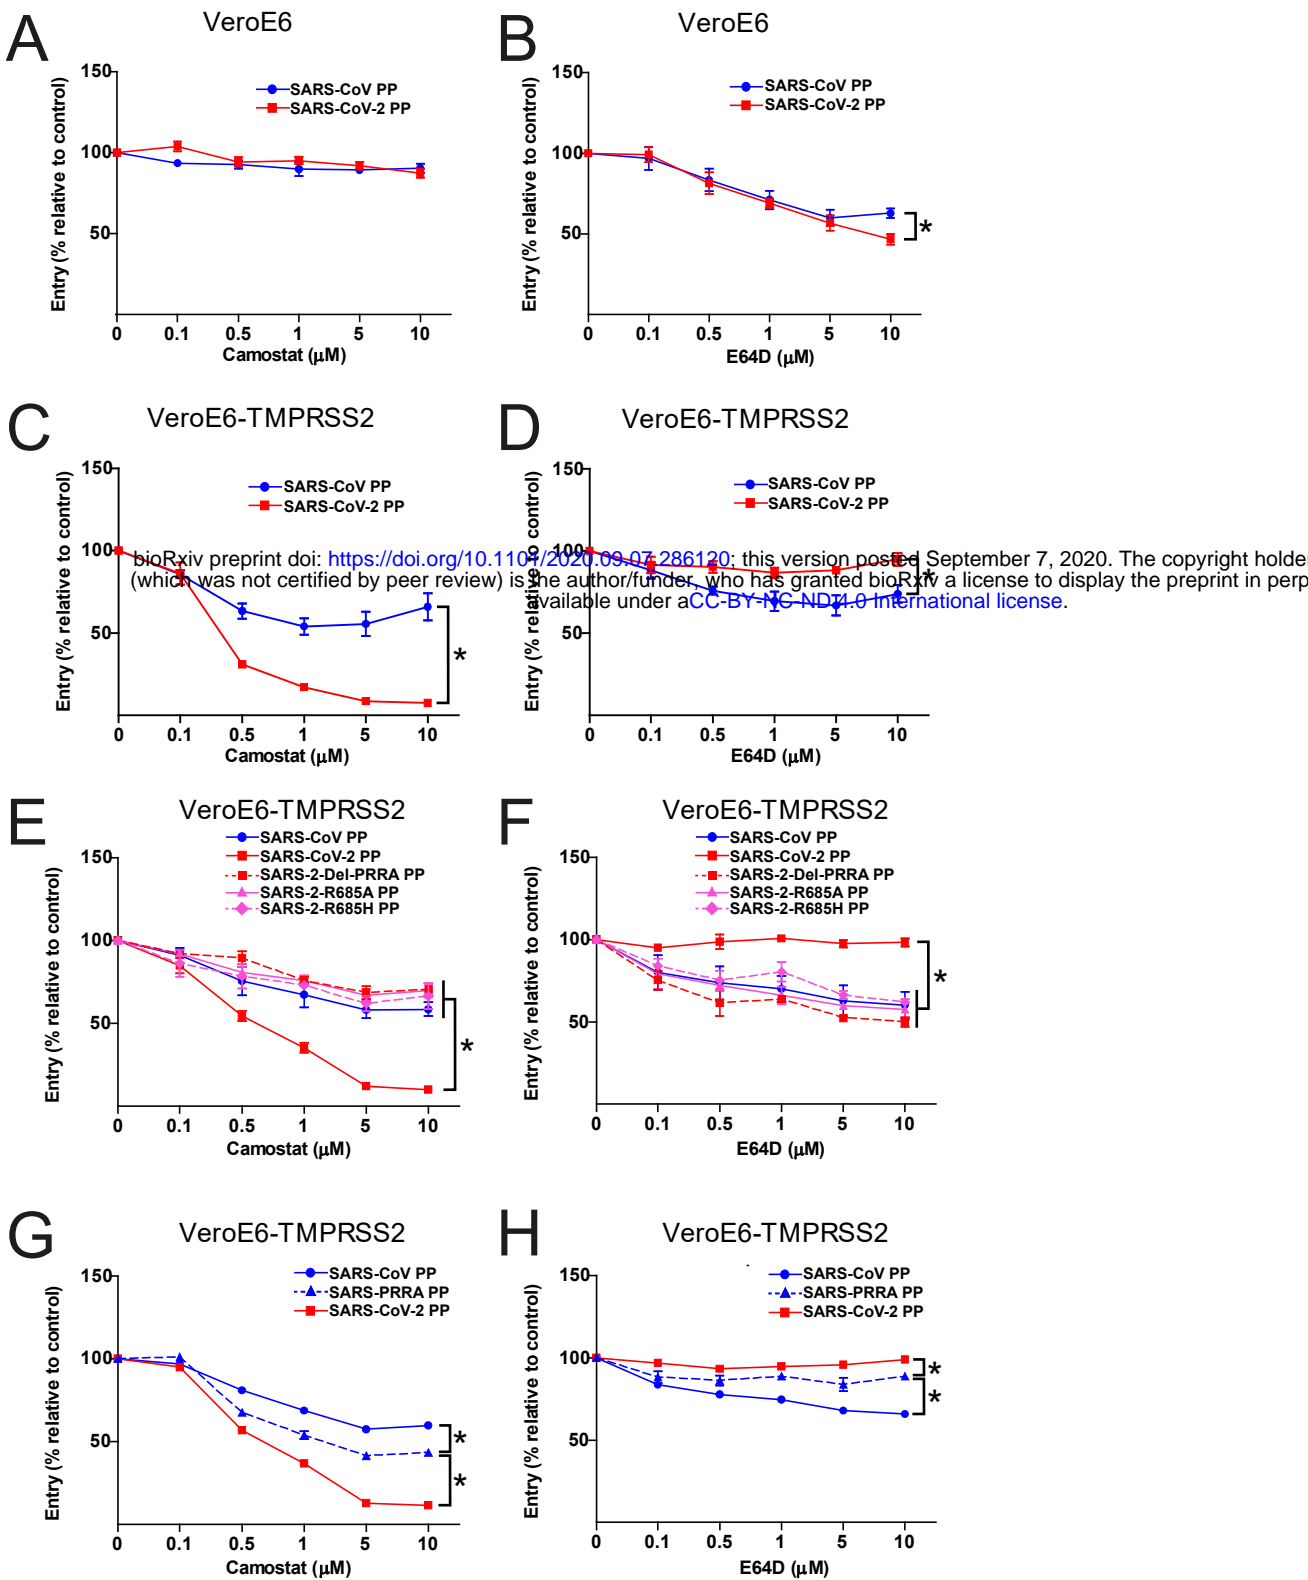

**Figure 4. The SARS-CoV-2 multibasic cleavage site increases serine protease usage.** (A and B) SARS-CoV PP and SARS-CoV-2 PP entry route on Ver0E6 cells pretreated with a concentration range of camostat (A) and E64D (B) to inhibit serine proteases and cathepsins, respectively. (C and D) SARS-CoV PP and SARS-CoV-2 PP entry route on Ver0E6-TMPRSS2 cells pretreated with a concentration range of camostat (C) and E64D (D) to inhibit serine proteases and cathepsins, respectively. T-test was performed for statistical analysis at the highest concentration. \*  $P < 0.05$ . (E and F) Entry route of SARS-CoV-2 PP and multibasic cleavage site mutants on Ver0E6-TMPRSS2 cells pretreated with a concentration range of camostat (E) and E64D (F) to inhibit serine proteases and cathepsins, respectively. One-way ANOVA was performed for statistical analysis comparing all groups to SARS-CoV-2 PPs at the highest concentration. \*  $P < 0.05$ . (G and H) Entry route of SARS-CoV PPs and SARS-PRRA PPs on Ver0E6-TMPRSS2 cells pretreated with a concentration range of camostat (G) and E64D (H) to inhibit serine proteases and cathepsins, respectively. One-way ANOVA was performed for statistical analysis comparing all groups to SARS-PRRA PPs at the highest concentration. \*  $P < 0.05$ . Error bars indicate SEM. PP = pseudoparticles. Representative experiments in triplicate from at least two independent experiments are shown.

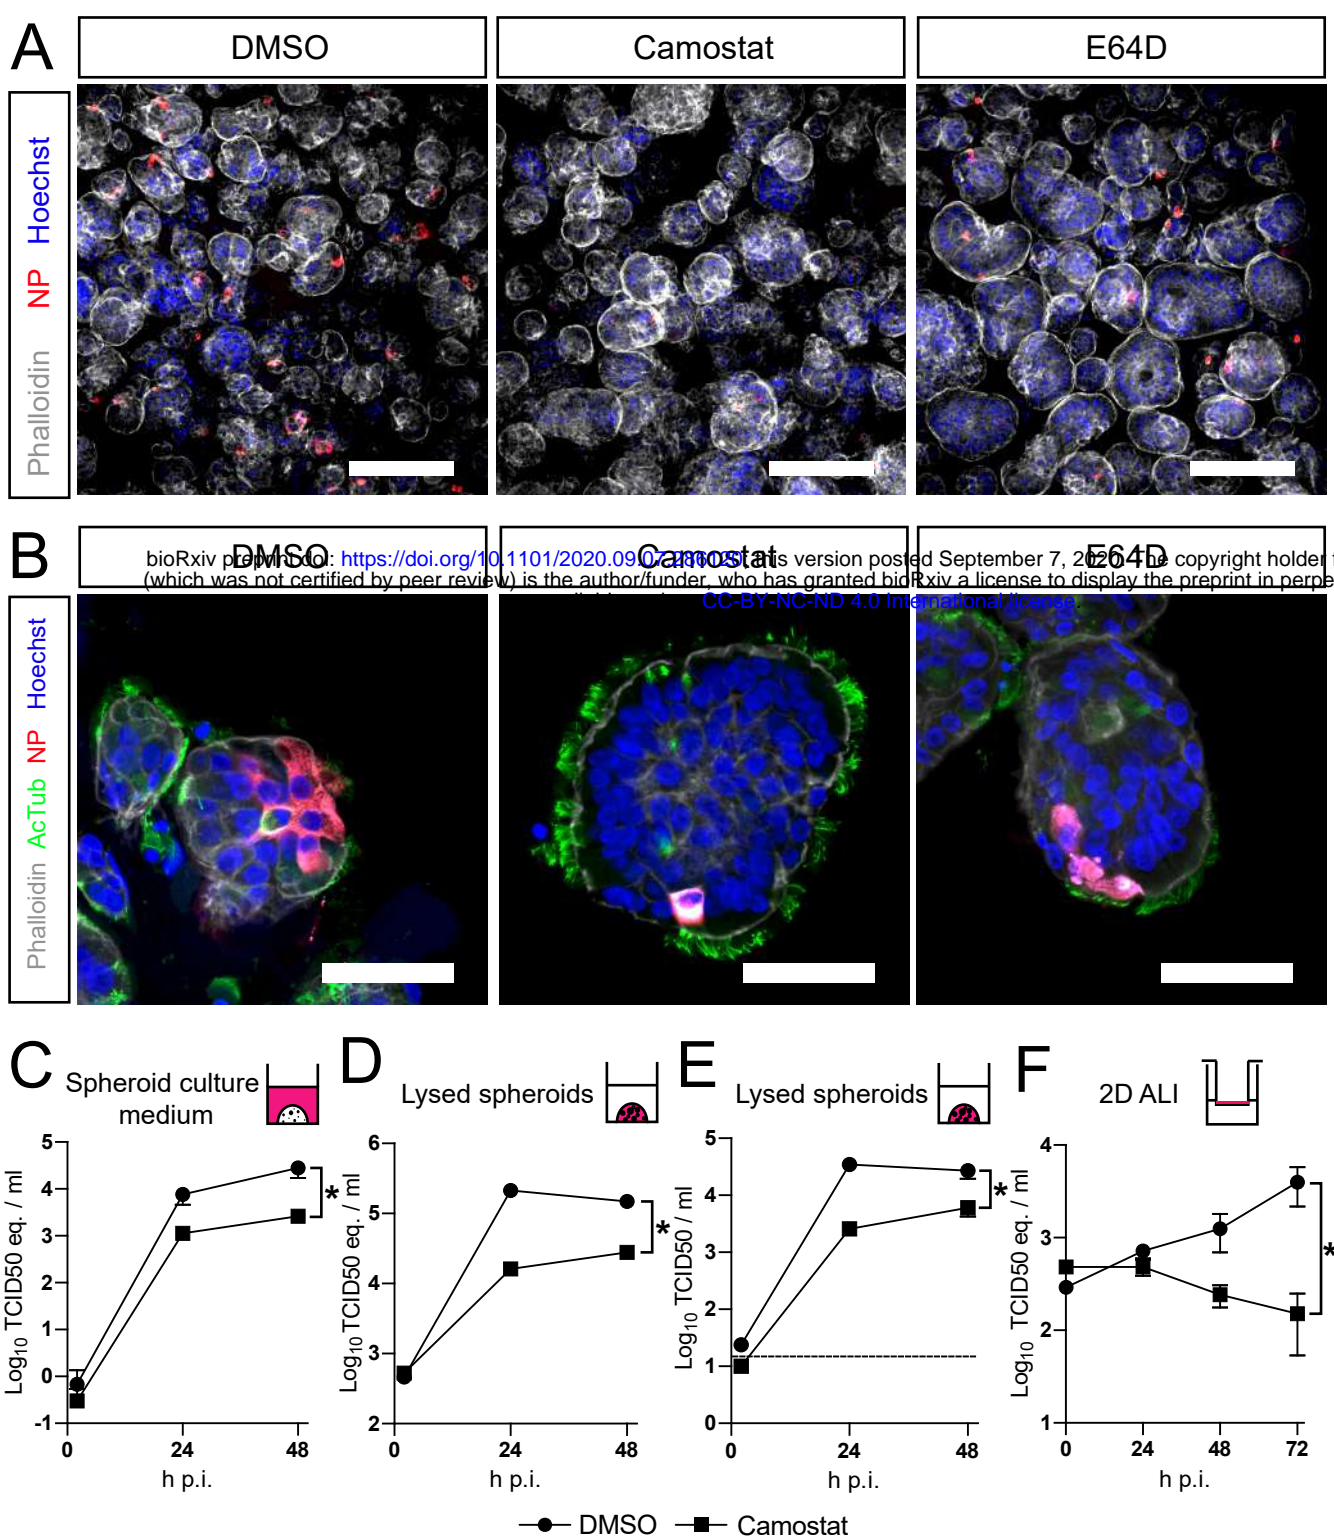

**Figure 5. SARS-CoV-2 entry and replication is dependent on serine proteases in differentiated organoid-derived human airway cells.** (A and B) Differentiated bronchiolar (A) or bronchial (B) airway spheroid cultures were infected at a MOI of 2. 16 hours (A) or 24 hours (B) post infection they were fixed and stained for viral nucleoprotein (red). Nuclei were stained with hoechst (blue) and actin was stained using phalloidin (white). AcTub stains ciliated cells (green). Scale bars indicate 200  $\mu$ m in A and 50  $\mu$ m in B. Representative images are shown from two independent experiments. (C to E) Replication kinetics of SARS-CoV-2 in bronchiolar airway spheroid cultures pretreated with camostat or carrier (DMSO). (C and D) TCID50 equivalents (eq.) per ml are shown in culture medium (C) and lysed organoids (D). (E) Live virus titers (TCID50/ml) in lysed organoids. Dotted line indicates limit of detection. (F) Replication kinetics of SARS-CoV-2 in 2D tracheal air-liquid interface airway cultures pretreated with camostat or carrier (DMSO). TCID50 eq. per ml in apical washes are shown. Error bars indicate SEM. H p.i. = hours post infection. Two-way ANOVA was performed for statistical analysis. \*  $P < 0.05$ .
