# Supplementary material for: The SARS-CoV-2 multibasic cleavage site facilitates early serine protease-mediated entry into organoid-derived human airway cells
Source: bioRxiv or medRxiv preprint supplement (doi:10.1101/2020.09.07.286120), 2020-09-07
Supplement: Supplementary file [file media-1.pdf]

1 The SARS-CoV-2 multibasic cleavage site facilitates early serine protease-  
2 mediated entry into organoid-derived human airway cells

3  
4 Anna Z. Mykytyn<sup>1†</sup>, Tim I. Breugem,<sup>1†</sup> Samra Riesebosch<sup>1</sup>, Debby Schipper<sup>1</sup>, Petra van den Doel<sup>1</sup>,  
5 Robbert J. Rottier<sup>2</sup>, Mart M. Lamers<sup>‡1</sup>, Bart L. Haagmans<sup>1‡\*</sup>

6 <sup>1</sup> Viroscience Department, Erasmus University Medical Center, Rotterdam, the Netherlands

7 <sup>2</sup> Department of Pediatric Surgery, Erasmus University Medical Center - Sophia Children's Hospital,  
8 Rotterdam, the Netherlands.

9  
10 \* Corresponding author: Bart L. Haagmans

11 **Email:** [b.haagmans@erasmusmc.nl](mailto:b.haagmans@erasmusmc.nl)

12  
13  
14 **This PDF file includes:**

15  
16       Supplementary methods  
17       Figure legends S1 to S3  
18       Supplementary references  
19       Figures S1 to S3  
20  
21

22

23

24

25

26

27

28

29

30

31

32

33

34

35

36

37

## 38 **Supplementary methods**

### 39 *Cloning*

40 Codon-optimized SARS-CoV (isolate CUHK-W1; VG40150-G-N) S expression plasmids (pCMV) were  
41 ordered from Sino-Biological and subcloned into pCAGGS using the ClaI and KpnI sites. The last 19  
42 amino acids containing the golgi retention signal of the SARS-CoV S protein were deleted to enhance PP  
43 production. Codon-optimized cDNA encoding SARS-CoV-2 S glycoprotein (isolate Wuhan-Hu-1) with a C-  
44 terminal 19 amino acid deletion was synthesized and cloned into pCAGSS in between the EcoRI and  
45 BglII sites. S expressing pCAGGS vectors were used for GFP-complementation fusion assays and  
46 equivalent S proteins with the C-terminal deletion were used for the production of PPs, as described in  
47 the material and methods. The cDNA encoding GFP1-10 was obtained from Addgene and was subcloned  
48 into pQXCIN (Clontech) in between BamHI and EcoRI to obtain the pQXCIN-GFP1-10 vector. The cDNA  
49 encoding human TMPRSS2 (NM\_005656; OHu13675D) was obtained from Genscript. The cDNA fused  
50 to a C-terminal HA tag was subcloned into pQXCIH (Clontech) in between the NotI and PacI sites to  
51 obtain the pQXCIH-TMPRSS2-HA vector. A synthetic DNA construct of  $\beta$ -Actin-7xGFP11-P2A-BFP was  
52 ordered from GenScript and subcloned into pGAGGS using EcoRI and BglII. SARS-CoV and SARS-CoV-  
53 2 S protein mutations (SARS-PRRA, SARS-2-Del-PRRA, SARS-2-R685A, SARS-2-R685H) were  
54 generated by subcloning synthetic DNA constructs (Genscript) containing the desired mutations into the  
55 pCAGGS-S vectors or by mutagenesis PCR.

56

### 57 *Generation of stable cell lines expressing GFP1-10 and TMPRSS2*

58 VeroE6 GFP1-10, VeroE6-TMPRSS2 cells, VeroE6-TMPRSS2 GFP1-10 cells and Calu-3 GFP1-10 cells  
59 were generated by retroviral transduction. To produce the retrovirus, 10  $\mu$ g pQXCIH-TMPRSS2-HA or  
60 pQXCIN-GFP1-10 was co-transfected with polyethylenimine (PEI) with 6.5  $\mu$ g pBS-gag-pol (Addgene  
61 #35614) and 5  $\mu$ g pMD2.G (Addgene #12259) in a 10 cm dish of 70% confluent HEK-293T cells in Opti-  
62 MEM I (1X) + GlutaMAX. Retroviral particles were harvested at 72 hours post transfection, cleared by  
63 centrifugation at 2000 x g, filtered through a 0.45 $\mu$ m low protein binding filter (Millipore), and used to  
64 transduce designated cells. Polybrene (Sigma) was added at a concentration of 4  $\mu$ g/ml to enhance

65 transduction efficiency. Transduced cells were selected with hygromycin B (Invitrogen) for TMPRSS2  
66 cells and/or geneticin (Invitrogen) for GFP1-10 cells.

67

#### 68 *VSV delta G rescue*

69 The protocol for VSV-G PP rescue was adapted from Whelan and colleagues (1995) (1). VSV rescue  
70 plasmids pVSV-eGFP-dG (#31842), pMD2.G (#12259), pCAG-VSV-P (#64088), pCAG-VSV-L (#64085),  
71 pCAG-VSV-N (#64087) and pCAGGS-T7Opt (#65974) were ordered from Addgene. Briefly, a 70%  
72 confluent 10 cm dish of HEK-293T cells was transfected with 10µg pVSV-eGFP-dG, 2µg pCAG-VSV-N  
73 (nucleocapsid), 2µg pCAG-VSV-L (polymerase), 2µg pMD2.G (glycoprotein, VSV-G), 2µg pCAG-VSV-P  
74 (phosphoprotein) and 2µg pCAGGS-T7Opt (T7 RNA polymerase) using PEI at a ratio of 1:3 (DNA:PEI) in  
75 Opti-MEM I (1X) + GlutaMAX. Forty-eight hours post transfection, the supernatant was transferred onto  
76 new plates transfected 24 hours prior with VSV-G. After a further 48 hours, these plates were re-  
77 transfected with VSV-G. After 24 hours the resulting PPs were collected, cleared by centrifugation at  
78 2000 x g for 5 minutes, and stored at -80°C. Subsequent VSV-G PP batches were produced by infecting  
79 VSV-G transfected HEK-293T cells with VSV-G PPs at a MOI of 0.1. Titers were determined by preparing  
80 10-fold serial dilutions in Opti-MEM I (1X) + GlutaMAX. Aliquots of each dilution were added to  
81 monolayers of  $2 \times 10^4$  Vero cells in the same medium in a 96-well plate. Three replicates were performed  
82 per PP stock. Plates were incubated at 37°C overnight and then scanned using an Amersham™ Typhoon  
83 scanner. Individual infected cells were quantified using ImageQuant TL software. All PP work was  
84 performed in a Class II Biosafety Cabinet under BSL-2 conditions at Erasmus Medical Center.

85

#### 86 *Spike protein western blot*

87 Concentrated PPs diluted in 4x Laemmli loading buffer were boiled for 30 minutes at 95°C. S transfected  
88 HEK-293T cells were lysed using IP Lysis Buffer (Pierce). Cell lysate was rotated for 30 minutes and  
89 centrifuged for 10 minutes at 15000 x g. Supernatant was used for subsequent protein expression  
90 analysis. Lysates were diluted in 4x Laemmli loading buffer containing 20% 2-mercaptoethanol and boiled  
91 for 30 minutes at 95°C. PPs and cell lysates were used for SDS-PAGE analysis using precast 10% TGX  
92 gels (Bio-Rad). Gels were run in tris-glycine SDS (TGS) buffer at 50V for 30 minutes and subsequently at

93 120V for 90 minutes. Transfer was performed at 300mA for 55 minutes onto .45 µm Immobilon-FL PVDF  
94 Membranes in tris-glycine buffer containing 20% methanol. Spike was stained using polyclonal rabbit-  
95 anti-SARS-CoV S1 (1:1000, Sino Biological) followed by infrared labelled secondary antibodies (1:20000,  
96 Licor). All cell lysate western blots are stained for GAPDH using a monoclonal mouse-anti-GAPDH  
97 antibody (sc-32233, 1:1000, Santa Cruz Biotechnology) followed by infrared labelled secondary  
98 antibodies. Western blots were scanned on an Odyssey CLx and analyzed using Image Studio Lite Ver  
99 5.2 software.

100

#### 101 *Silver staining*

102 All PP western blots had corresponding silver stains performed to assess the quality of the PP preps and  
103 for the detection of VSV-N. Samples boiled in Laemmli buffer for western blot analysis were also ran on a  
104 10% w/v gel at 50V for 30 minutes followed by 120V for 90 minutes before transferring gel into ultrapure  
105 water. Silver stains were performed per manufacturer's instructions using the Silver Stain for Mass  
106 Spectrometry kit (Pierce). Colorimetric images were taken on the Amersham™ AI600 (GE Healthcare).

107

108

109 **Fig. S1. Organoid-derived 2D air-liquid interface cultures are well-differentiated and express ACE2**  
110 **and TMPRSS2.** (A to C) Immunofluorescent or immunohistochemistry staining of differentiated airway  
111 cultures. Anti-AcTub (green) and anti-FOXJ1 (white) stains ciliated cells (A), anti-SCGB1A1 (magenta)  
112 stains club cells (B) and anti-MUC5AC (yellow) stains goblet cells (C). Nuclei are stained with hoechst  
113 (blue). (D to E) Airway cultures also expressed the SARS-CoV-2 entry receptor ACE2 (D) and TMPRSS2  
114 (E). Haematoxylin was used as a counterstain in D and E. Scale bars indicate 20 µm. Representative  
115 images are shown from a bronchiolar culture.

116

117 **Fig. S2. SARS-CoV PP infectivity into Calu-3 cells is not altered by the insertion of the multibasic**  
118 **cleavage site.** Titrations of SARS-CoV PPs and SARS-PRRA PPs on Calu-3 cells. Error bars indicate  
119 SEM. A representative experiment in triplicate from three independent experiments is shown.

120

121 **Fig. S3. A GFP-complementation based assay for assessing coronavirus fusogenicity.** (A) HEK-  
122 293T cells expressing an empty vector or S protein together with GFP-11 tagged beta actin and a BFP  
123 containing a nuclear localization signal were added to cells stably expressing GFP1-10. Fusion of these  
124 two cell types allowed GFP-complementation in cells expressing a nuclear BFP, facilitating easy  
125 quantification of nuclei per syncytial cell. Unfused cells only expressed BFP in the nucleus. Fusion with  
126 VeroE6 GFP1-10 cells 18 hours after addition of the fusogenic HEK-293T is shown as an example. (B to  
127 D) Full well scans of the complemented GFP signal 18 hours after addition of the fusogenic HEK-293T  
128 cells to Calu-3 GFP1-10 (B), VeroE6 GFP1-10 (C) and VeroE6-TMPRSS2 GFP1-10 (D) cells are shown.  
129 Dashed areas are enlarged next to each well. Scale bars indicate 50  $\mu$ m.

130

131

### 132 **Supplementary references**

133

- 134 1. S. P. Whelan, L. A. Ball, J. N. Barr, G. T. Wertz, Efficient recovery of infectious vesicular  
135 stomatitis virus entirely from cDNA clones. *Proc Natl Acad Sci U S A* **92**, 8388-8392 (1995).

136

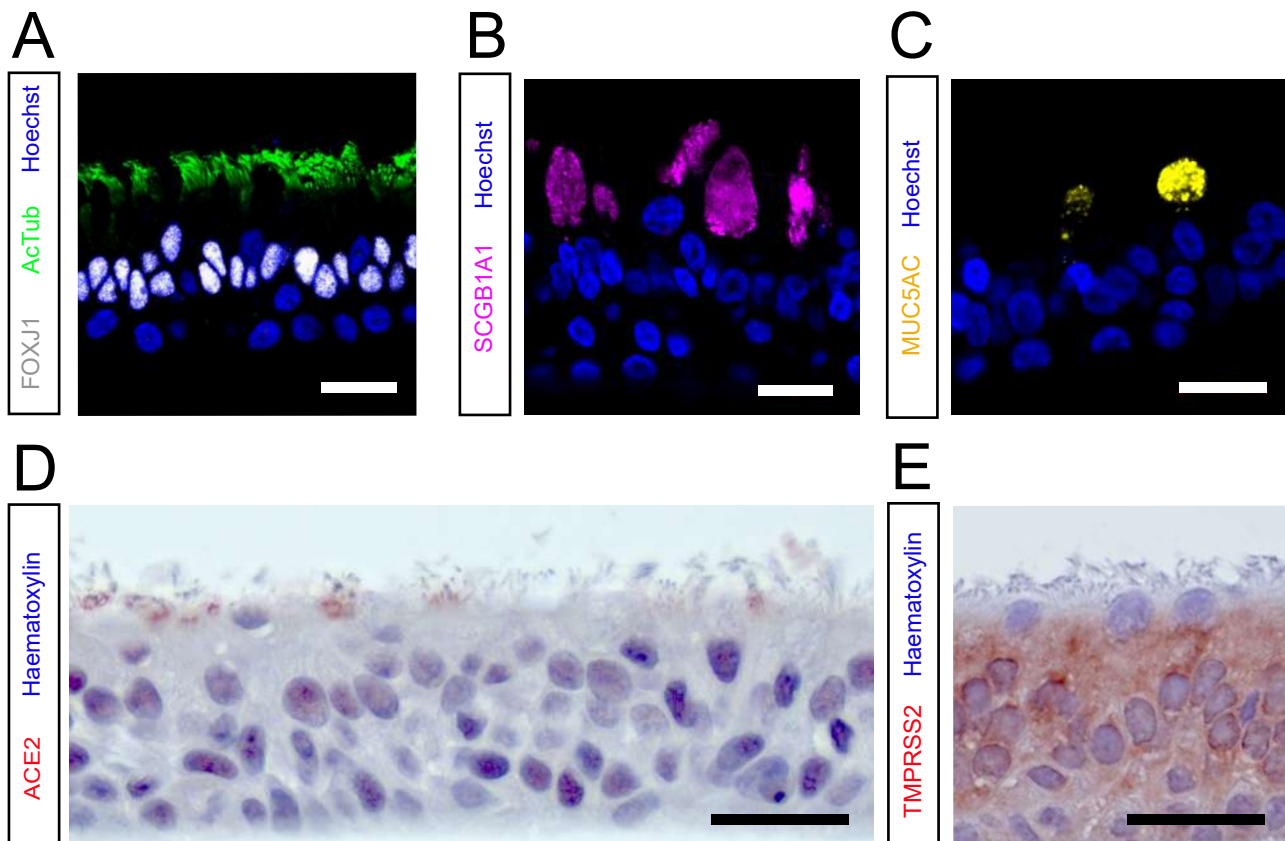

**Fig. S1. Organoid-derived 2D air-liquid interface cultures are well-differentiated and express ACE2 and TMPRSS2.** (A to C) Immunofluorescent or immunohistochemistry staining of differentiated airway cultures. Anti-AcTub (green) and anti-FOXJ1 (white) stains ciliated cells (A), anti-SCGB1A1 (magenta) stains club cells (B) and anti-MUC5AC (yellow) stains goblet cells (C). Nuclei are stained with hoechst (blue). (D to E) Airway cultures also expressed the SARS-CoV-2 entry receptor ACE2 (D) and TMPRSS2 (E). Haematoxylin was used as a counterstain in D and E. Scale bars indicate 20 μm. Representative images are shown from a bronchiolar culture.

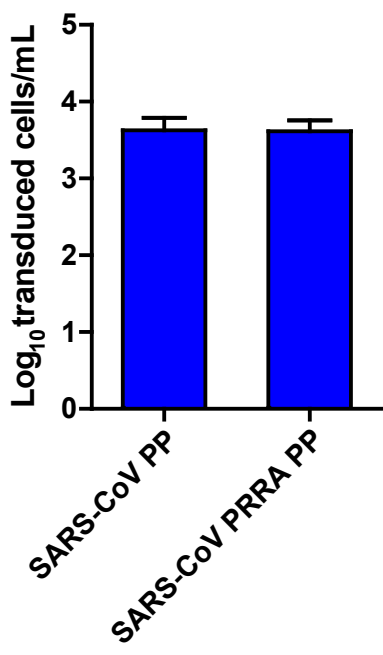

**Fig. S2. SARS-CoV PP infectivity into Calu-3 cells is not altered by the insertion of the multibasic cleavage site.** Titrations of SARS-CoV PPs and SARS-PRRA PPs on Calu-3 cells. Error bars indicate SEM. A representative experiment in triplicate from three independent experiments is shown.

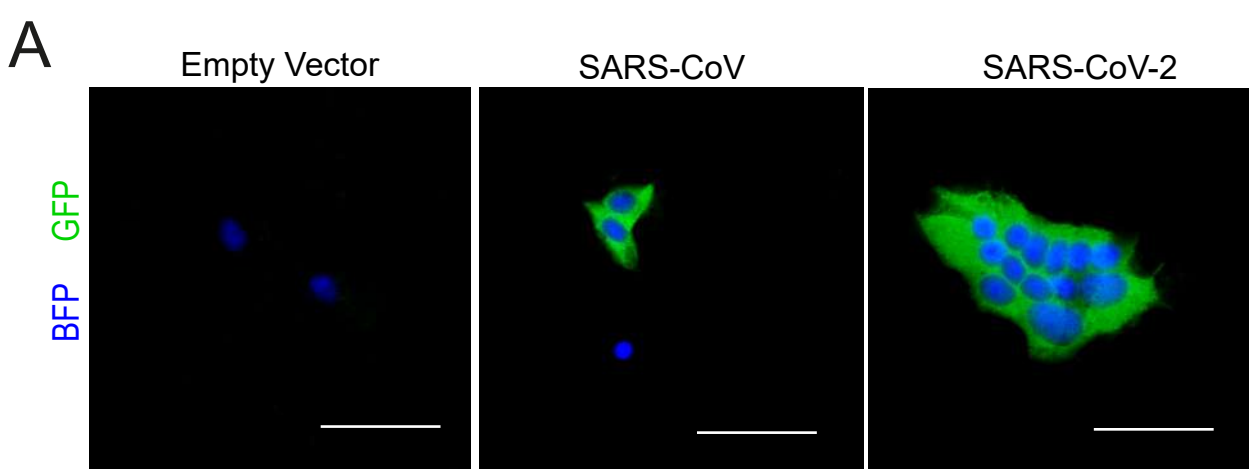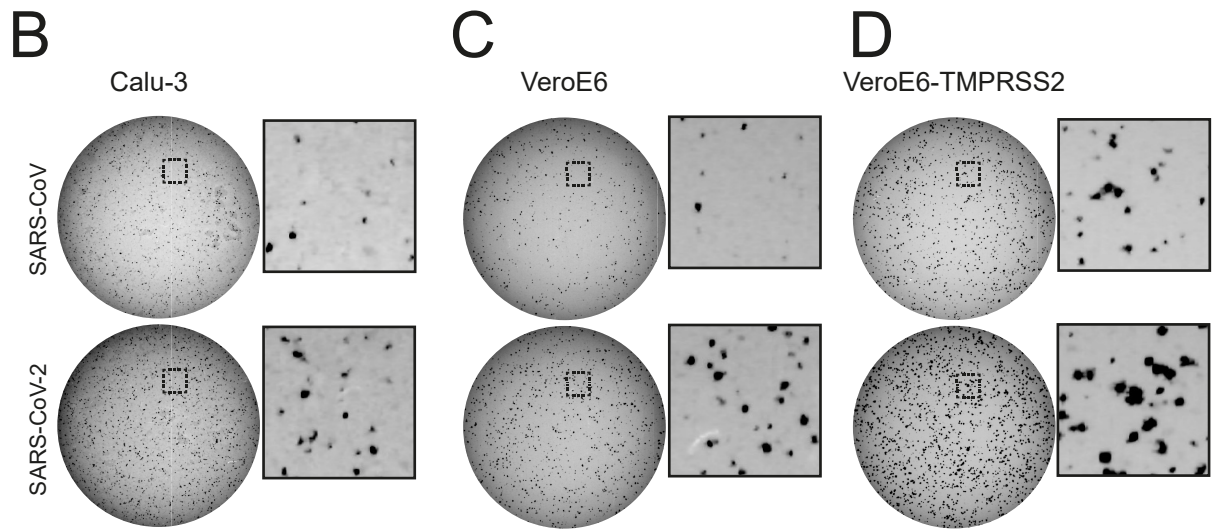

**Fig. S3. A GFP-complementation based assay for assessing coronavirus fusogenicity.** (A) HEK-293T cells expressing an empty vector or S protein together with GFP-11 tagged beta actin and a BFP containing a nuclear localization signal were added to cells stably expressing GFP-10. Fusion of these two cell types allowed GFP-complementation in cells expressing a nuclear BFP, facilitating easy quantification of nuclei per syncytial cell. Unfused cells only expressed BFP in the nucleus. Fusion with VeroE6 GFP1-10 cells 18 hours after addition of the fusogenic HEK-293T is shown as an example. (B to D) Full well scans of the complemented GFP signal 18 hours after addition of the fusogenic HEK-293T cells to Calu-3 GFP1-10 (B), VeroE6 GFP1-10 (C) and VeroE6-TMPRSS2 GFP1-10 (D) cells are shown. Dashed areas are enlarged next to each well. Scale bars indicate 50  $\mu$ m.
